# Supplementary material for: Integration of relational and hierarchical network information for protein function prediction
Source: Springer Nature journal article supplement (doi:10.1186/1471-2105-9-350), 2008-08-22

# Integration of Relational and Hierarchical Network Information for Protein Function Prediction

Additional file - 2

Xiaoyu Jiang, Naoki Nariai, Martin Steffen, Simon Kasif, Eric D. Kolaczyk

---

Colors: HBN (red); BN (light blue); NN (blue).

1. Hierarchy root: GO:0006139, nucleobase, nucleoside, nucleotide and nucleic acid metabolism  
Number of terms in hierarchy = 154  
Number of terms predicted = 58  
Number of genes predicted = 31

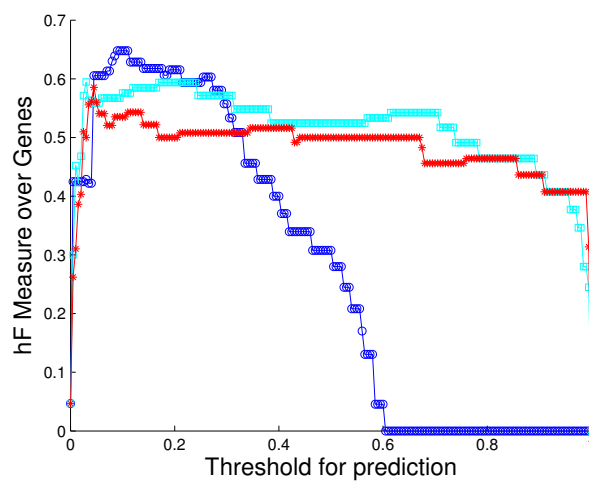

2. Hierarchy root: GO:0008150, biological process  
Number of terms in hierarchy = 70  
Number of terms predicted = 40  
Number of genes predicted = 58

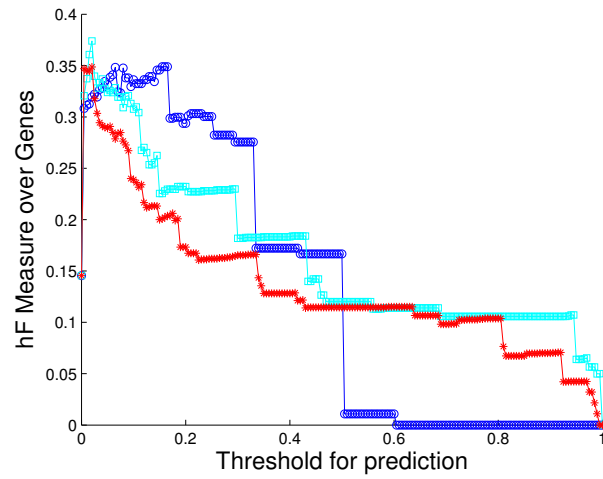

3. Hierarchy root: GO:0009987, cellular process  
Number of terms in hierarchy = 47  
Number of terms predicted = 33  
Number of genes predicted = 74

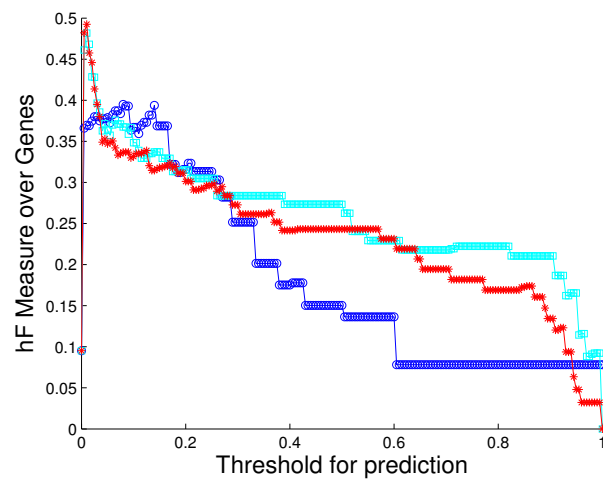

4. Hierarchy root: GO:0016043, cell organization and biogenesis  
 Number of terms in hierarchy = 53  
 Number of terms predicted = 40  
 Number of genes predicted = 34

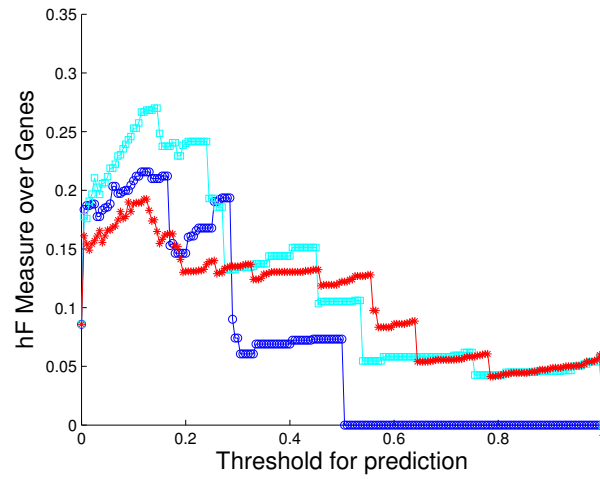

5. Hierarchy root: GO:0019219, regulation of nucleobase, nucleoside, nucleotide and nucleic acid metabolism  
 Number of terms in hierarchy = 32  
 Number of terms predicted = 15  
 Number of genes predicted = 8

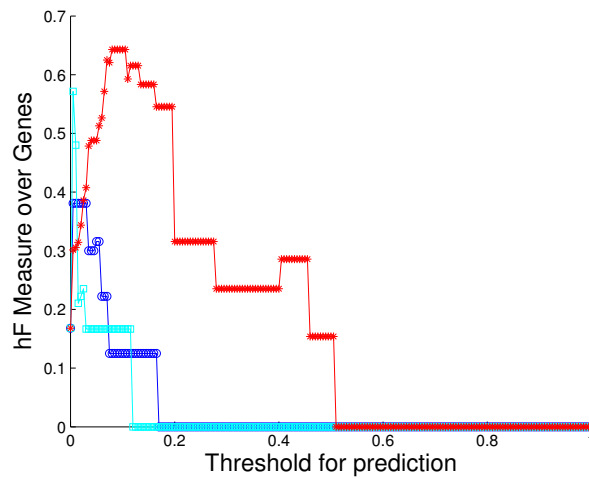

6. Hierarchy root: GO:0019222, regulation of metabolism  
 Number of terms in hierarchy = 33  
 Number of terms predicted = 13  
 Number of genes predicted = 11

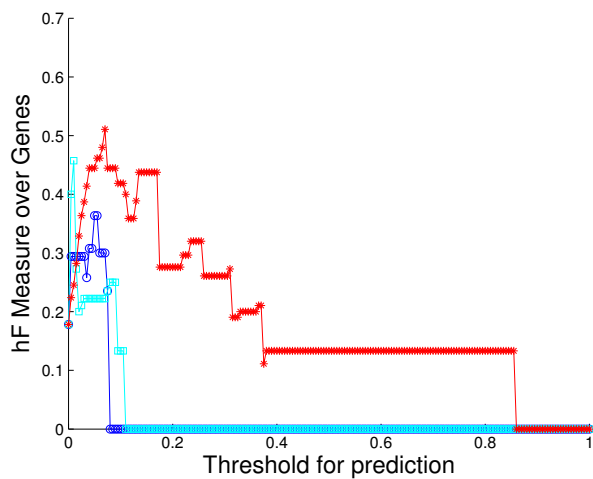

7. Hierarchy root: GO:0019538, protein metabolism  
 Number of terms in hierarchy = 36  
 Number of terms predicted = 14  
 Number of genes predicted = 14

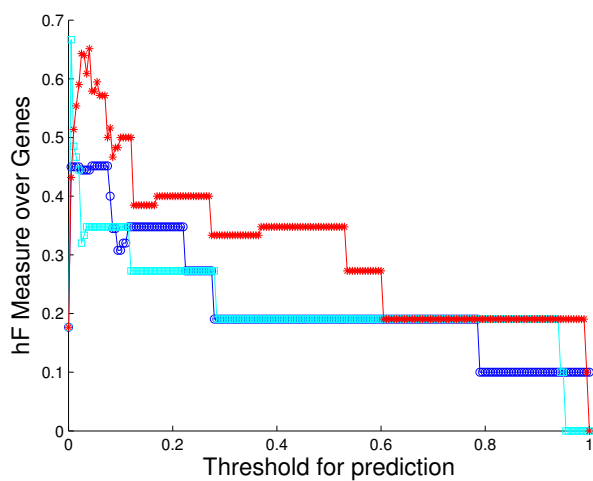

8. Hierarchy root: GO:0031323, regulation of cellular metabolism  
 Number of terms in hierarchy = 33  
 Number of terms predicted = 16  
 Number of genes predicted = 10

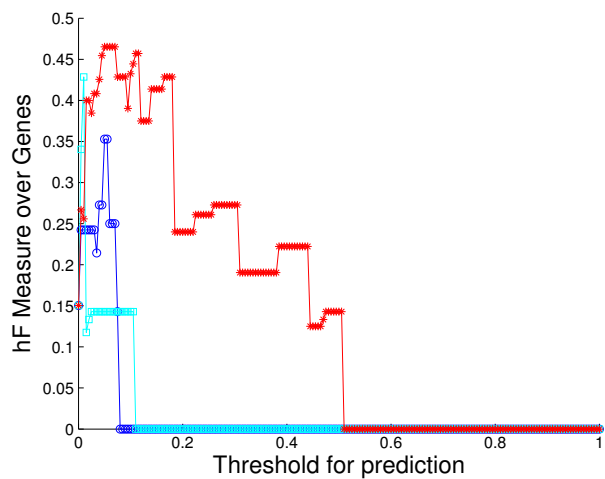

9. Hierarchy root: GO:0043170, macromolecule matabolism  
 Number of terms in hierarchy = 73  
 Number of terms predicted = 35  
 Number of genes predicted = 20

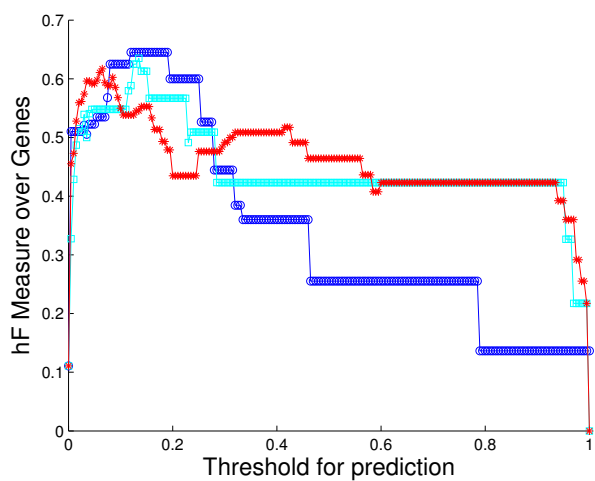

10. **Hierarchy root: GO:0043283, biopolymer metabolism**  
 Number of terms in hierarchy = 53  
 Number of terms predicted = 35  
 Number of genes predicted = 12

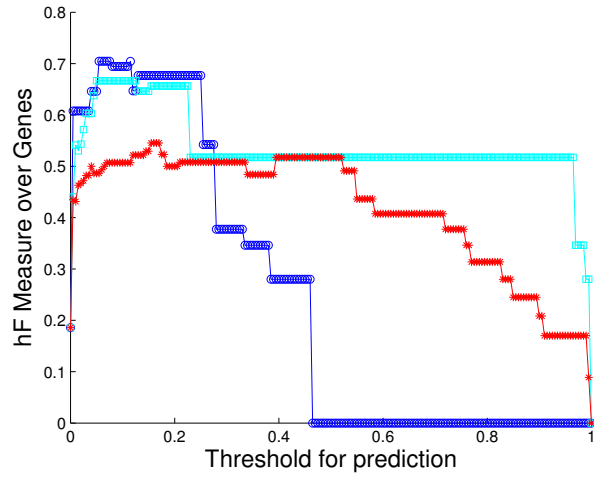

11. **Hierarchy root: GO:0044237, cellular metabolism**  
 Number of terms in hierarchy = 266  
 Number of terms predicted = 148  
 Number of genes predicted = 51

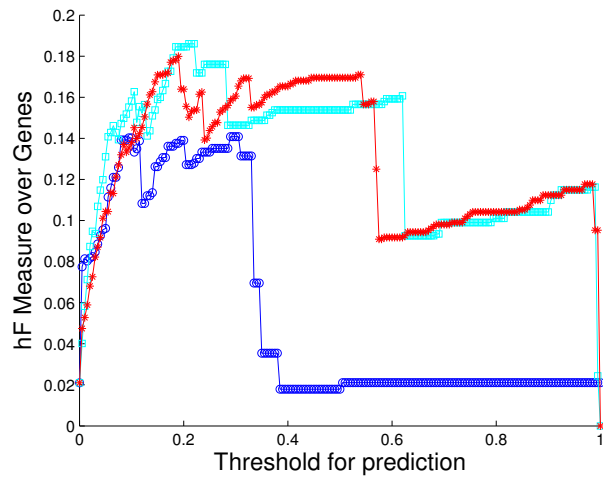

12. Hierarchy root: GO:0044238, primary metabolism  
 Number of terms in hierarchy = 266  
 Number of terms predicted = 149  
 Number of genes predicted = 8

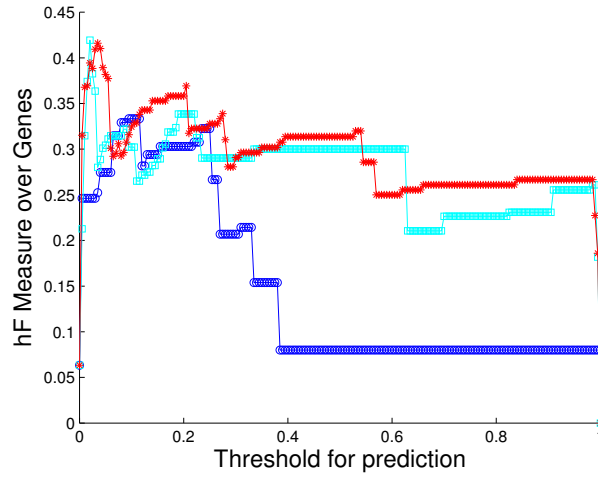

13. Hierarchy root: GO:0050789, regulation of biological process  
 Number of terms in hierarchy = 42  
 Number of terms predicted = 18  
 Number of genes predicted = 27

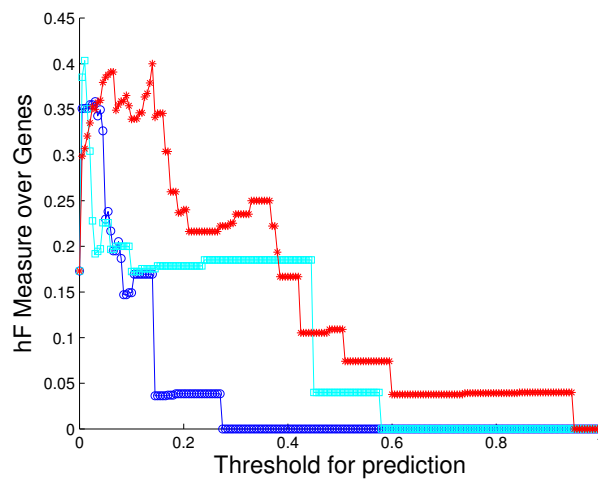

14. Hierarchy root: GO:0050794, regulation of cellular process  
 Number of terms in hierarchy = 7  
 Number of terms predicted = 2  
 Number of genes predicted = 21

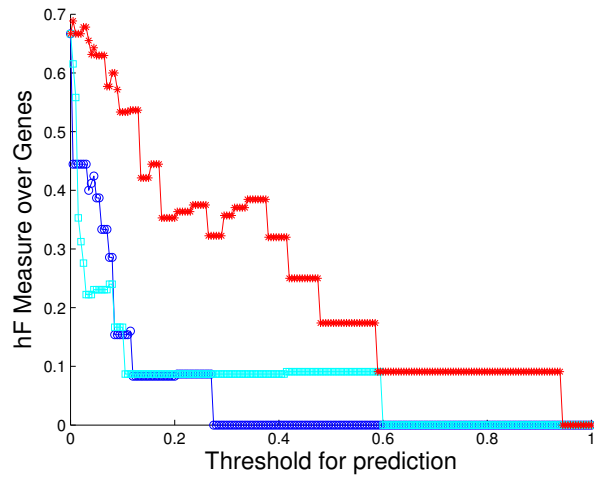

15. Hierarchy root: GO:0050875, cellular physiological process  
 Number of terms in hierarchy = 83  
 Number of terms predicted = 58  
 Number of genes predicted = 46

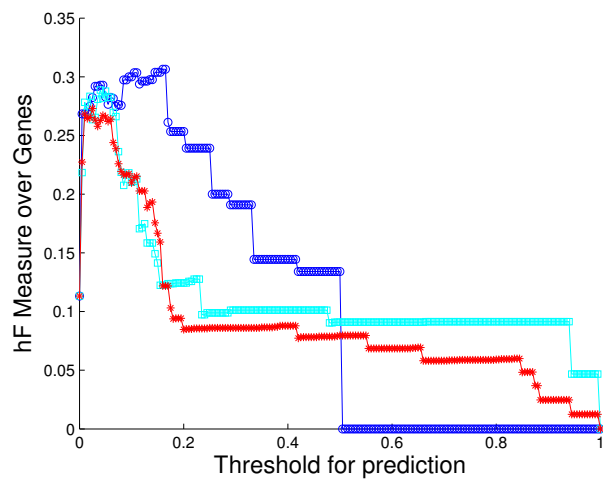



16. Hierarchy root: GO:0050896, response to stimulus  
 Number of terms in hierarchy = 72  
 Number of terms predicted = 39  
 Number of genes predicted = 8

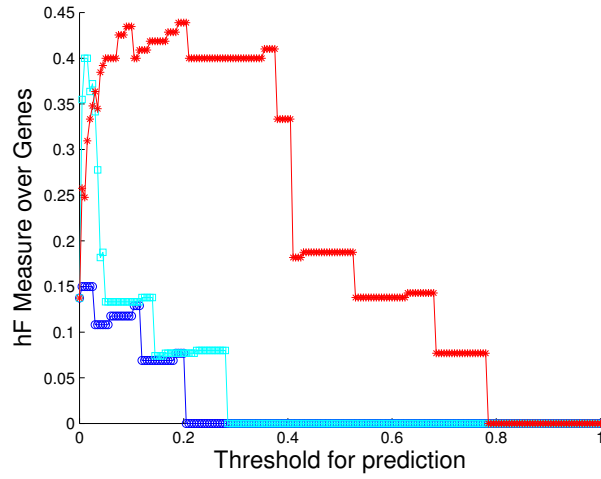

17. Hierarchy root: GO:0051234, establishment of localization  
 Number of terms in hierarchy = 8  
 Number of terms predicted = 5  
 Number of genes predicted = 12

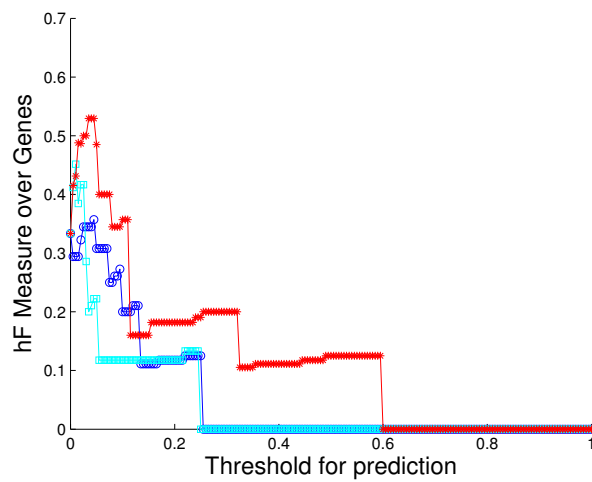

Supplement: 12859_2008_2335_MOESM2_ESM.pdf [file 12859_2008_2335_MOESM2_ESM.pdf]
