# Supplementary material for: Integration of relational and hierarchical network information for protein function prediction
Source: Springer Nature journal article supplement (doi:10.1186/1471-2105-9-350), 2008-08-22
Supplement: 12859_2008_2335_MOESM1_ESM.pdf [file 12859_2008_2335_MOESM1_ESM.pdf]

# Integration of Relational and Hierarchical Network Information for Protein Function Prediction

Additional file - 1

Xiaoyu Jiang, Naoki Nariai, Martin Steffen, Simon Kasif, Eric D. Kolaczyk

- 
1. Hierarchy root: GO:0006139, nucleobase, nucleoside, nucleotide and nucleic acid metabolism  
Number of terms in hierarchy = 154  
Number of terms predicted = 59  
Number of genes predicted = 1327

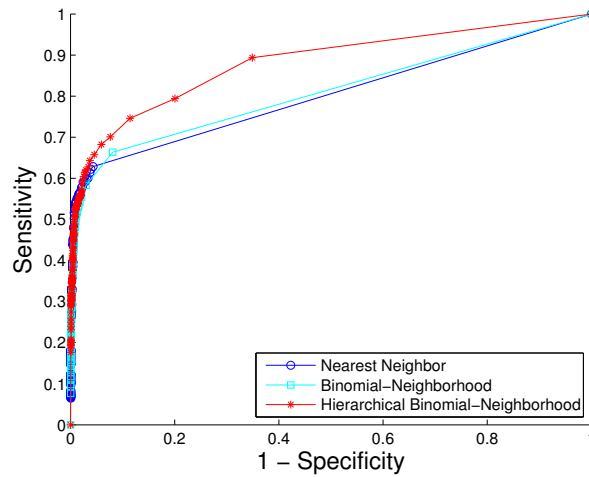

Figure 1: ROC curves by 5-fold cross-validation study.

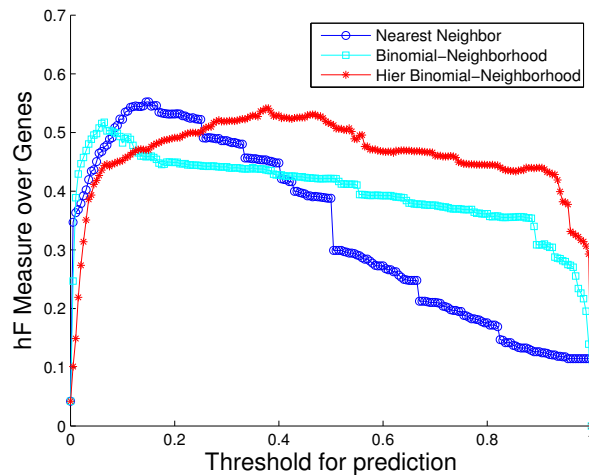

Figure 2:  $hF$  measure v.s. threshold.

2. Hierarchy root: GO:0006259, DNA metabolism  
 Number of terms in hierarchy = 108  
 Number of terms predicted = 68  
 Number of genes predicted = 501

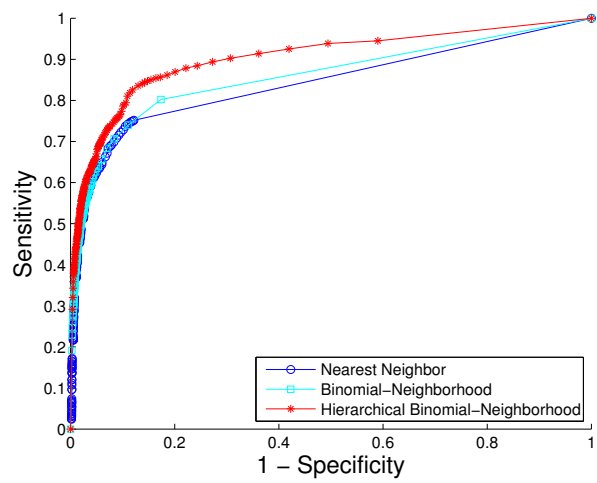

Figure 1: ROC curves by 5-fold cross-validation study.

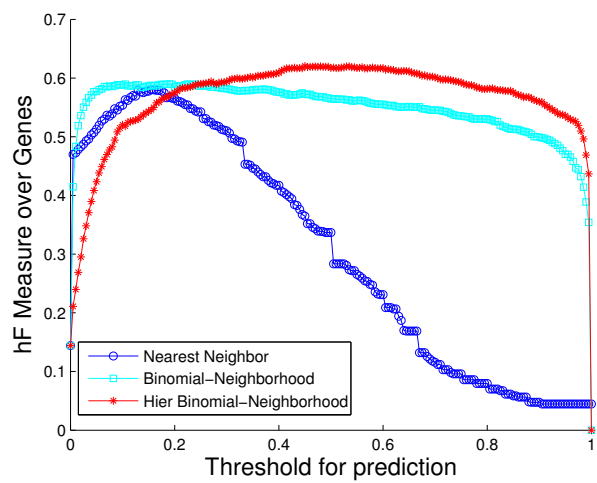

Figure 2:  $hF$  measure v.s. threshold.

3. Hierarchy root: GO:0006351, transcription, DNA-dependent  
 Number of terms in hierarchy = 57  
 Number of terms predicted = 37  
 Number of genes predicted = 426

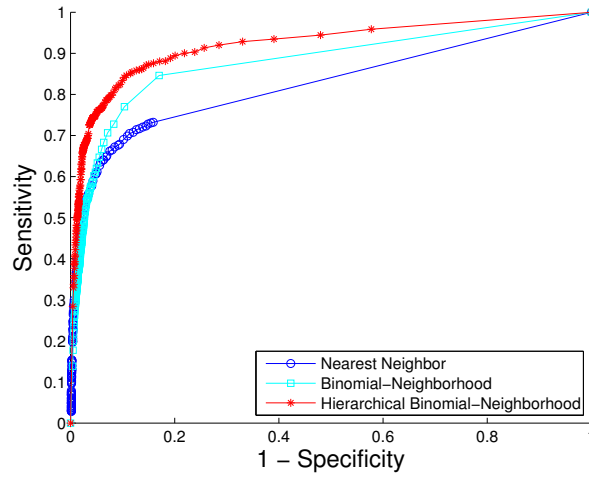

Figure 1: ROC curves by 5-fold cross-validation study.

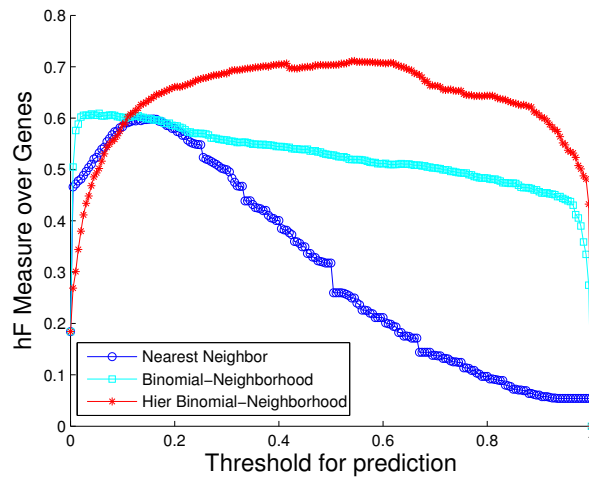

Figure 2:  $hF$  measure v.s. threshold.

4. Hierarchy root: GO:0006396, RNA processing  
 Number of terms in hierarchy = 57  
 Number of terms predicted = 24  
 Number of genes predicted = 322

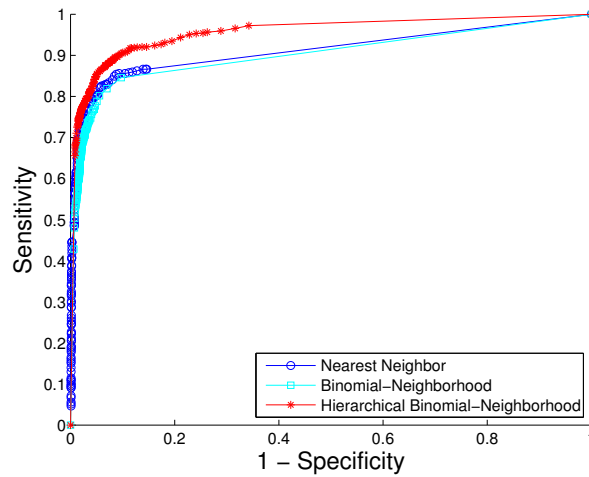

Figure 1: ROC curves by 5-fold cross-validation study.

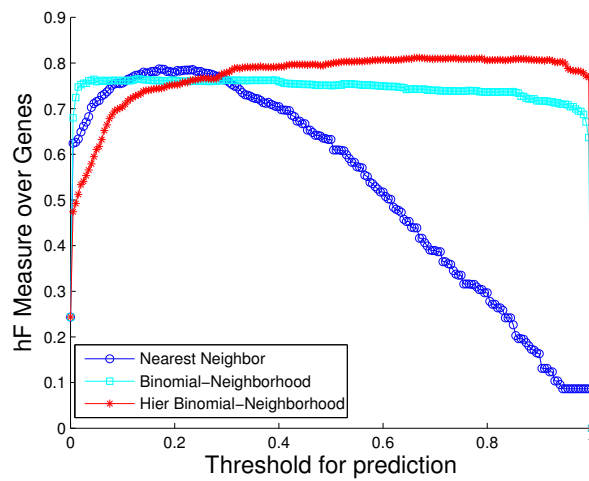

Figure 2:  $hF$  measure v.s. threshold.

5. Hierarchy root: GO:0006412, protein biosynthesis  
 Number of terms in hierarchy = 66  
 Number of terms predicted = 28  
 Number of genes predicted = 464

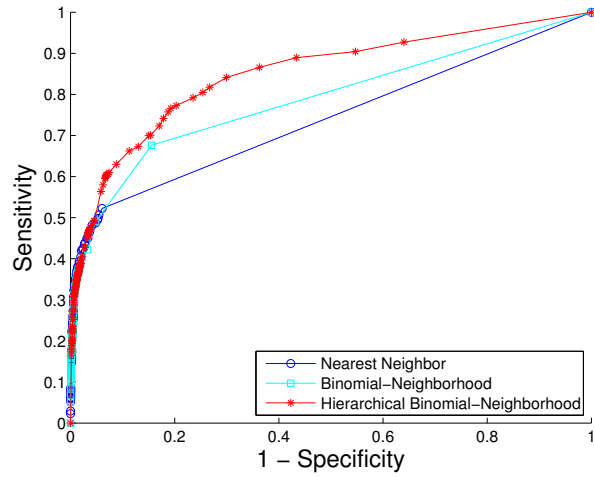

Figure 1: ROC curves by 5-fold cross-validation study.

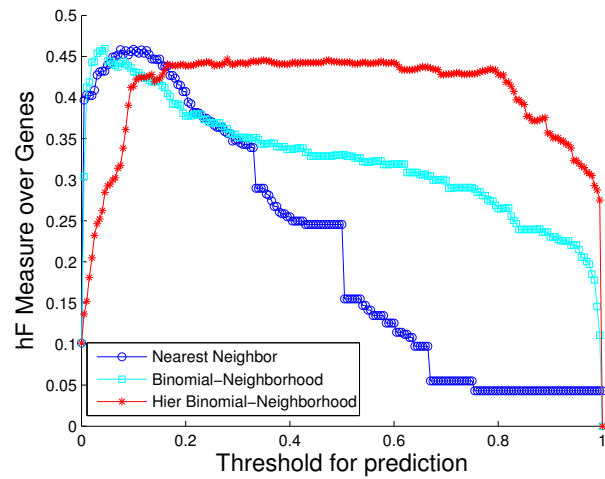

Figure 2:  $hF$  measure v.s. threshold.

6. Hierarchy root: GO:0006464, protein modification  
 Number of terms in hierarchy = 86  
 Number of terms predicted = 43  
 Number of genes predicted = 430

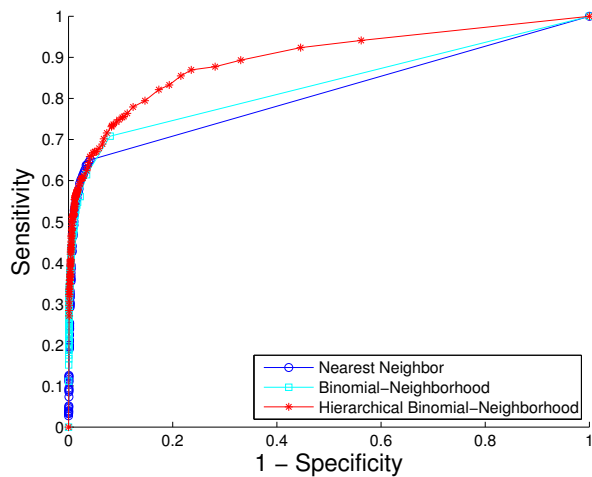

Figure 1: ROC curves by 5-fold cross-validation study.

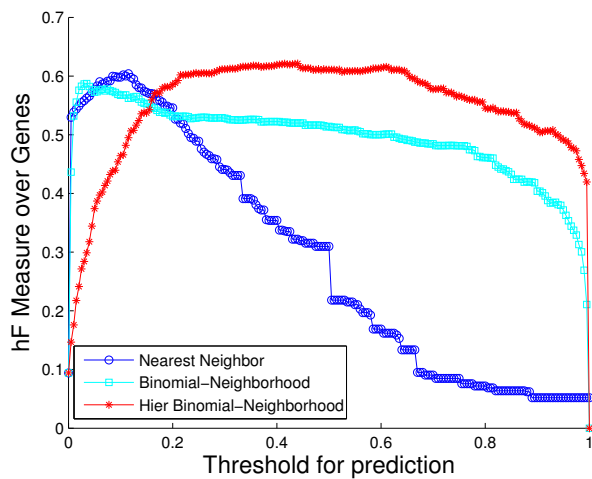

Figure 2:  $hF$  measure v.s. threshold.

7. Hierarchy root: GO:0006810, transport  
 Number of terms in hierarchy = 175  
 Number of terms predicted = 67  
 Number of genes predicted = 906

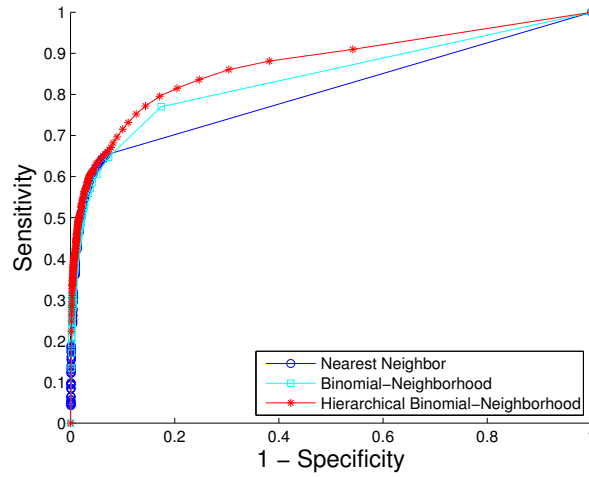

Figure 1: ROC curves by 5-fold cross-validation study.

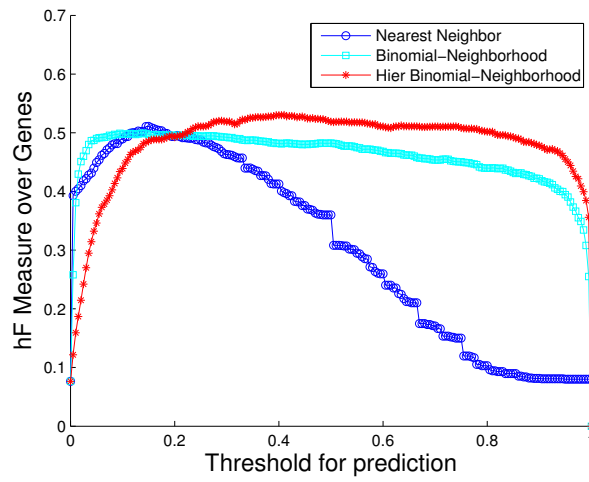

Figure 2:  $hF$  measure v.s. threshold.

8. Hierarchy root: GO:0006950, response to stress  
 Number of terms in hierarchy = 73  
 Number of terms predicted = 36  
 Number of genes predicted = 389

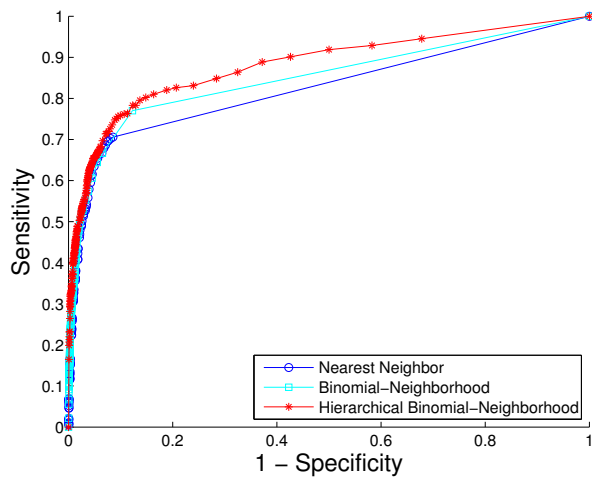

Figure 1: ROC curves by 5-fold cross-validation study.

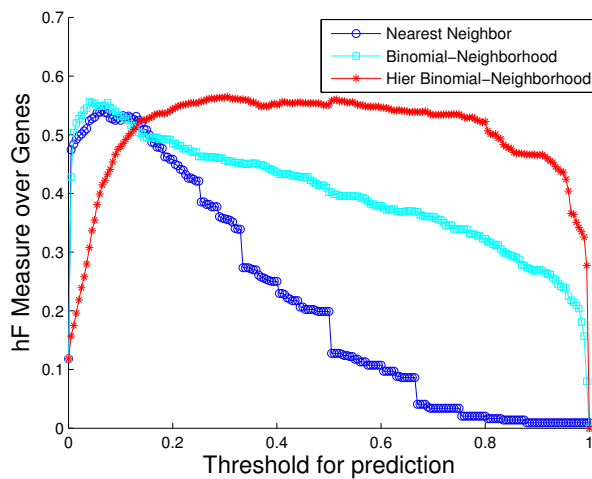

Figure 2:  $hF$  measure v.s. threshold.



9. Hierarchy root: GO:0006996, organelle organization and biogenesis  
 Number of terms in hierarchy = 122  
 Number of terms predicted = 68  
 Number of genes predicted = 992

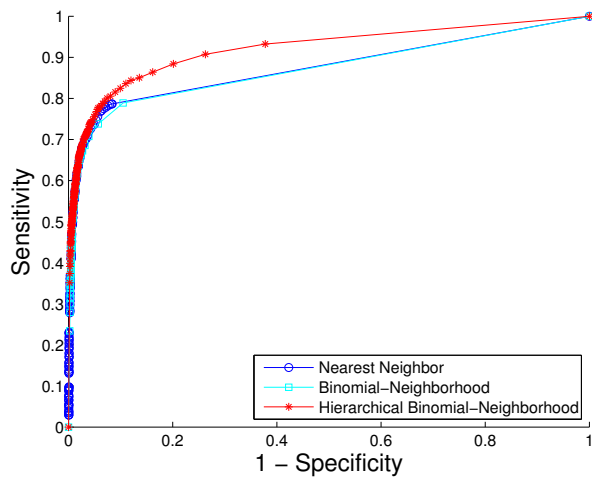

Figure 1: ROC curves by 5-fold cross-validation study.

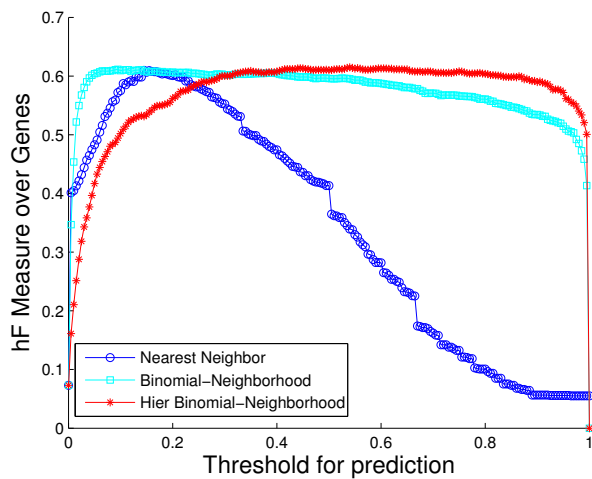

Figure 2:  $hF$  measure v.s. threshold.

10. Hierarchy root: GO:0007001, chromosome organization and biogenesis (sensu Eukaryota)  
 Number of terms in hierarchy = 32  
 Number of terms predicted = 23  
 Number of genes predicted = 356

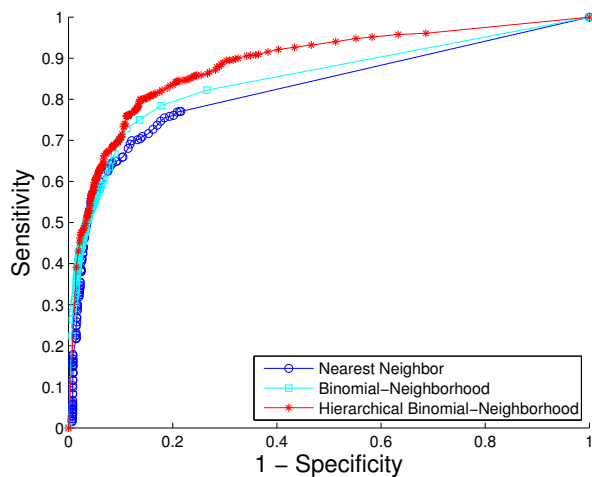

Figure 1: ROC curves by 5-fold cross-validation study.

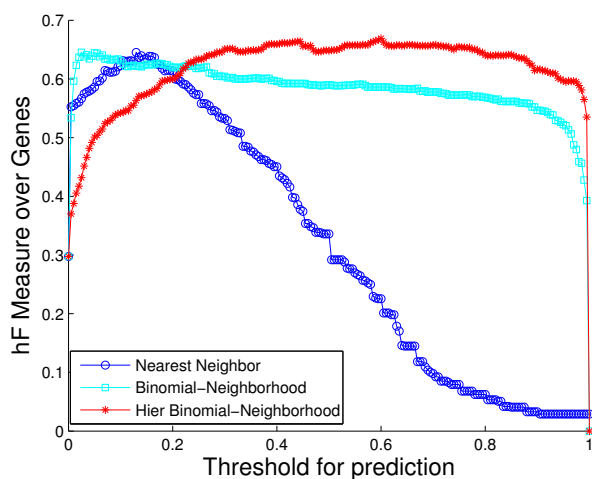

Figure 2:  $hF$  measure v.s. threshold.

11. Hierarchy root: GO:0007049, cell cycle  
 Number of terms in hierarchy = 97  
 Number of terms predicted = 63  
 Number of genes predicted = 399

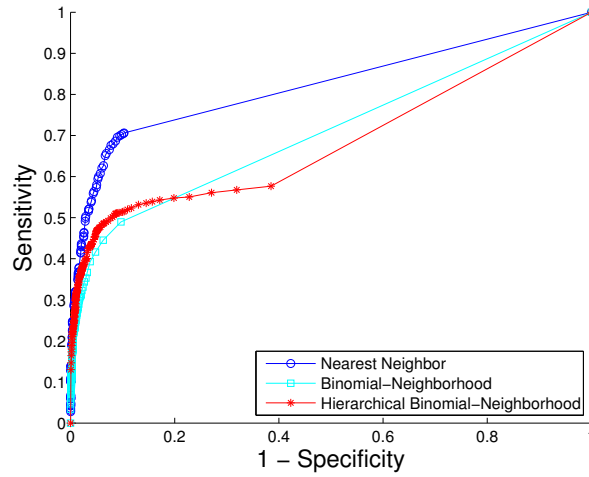

Figure 1: ROC curves by 5-fold cross-validation study.

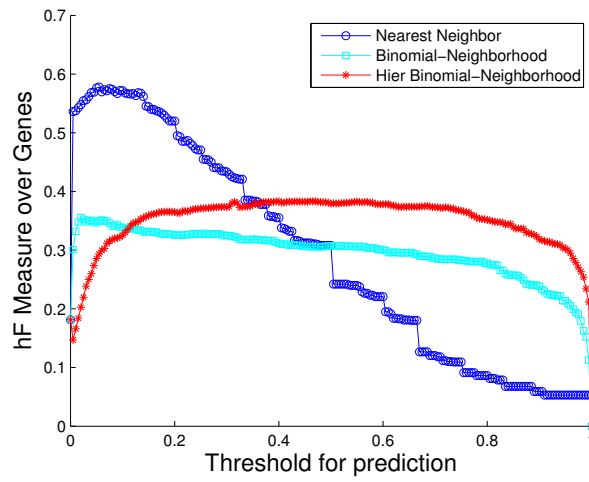

Figure 2:  $hF$  measure v.s. threshold.

12. Hierarchy root: GO:0007275, multicellular organismal development  
 Number of terms in hierarchy = 72  
 Number of terms predicted = 48  
 Number of genes predicted = 348

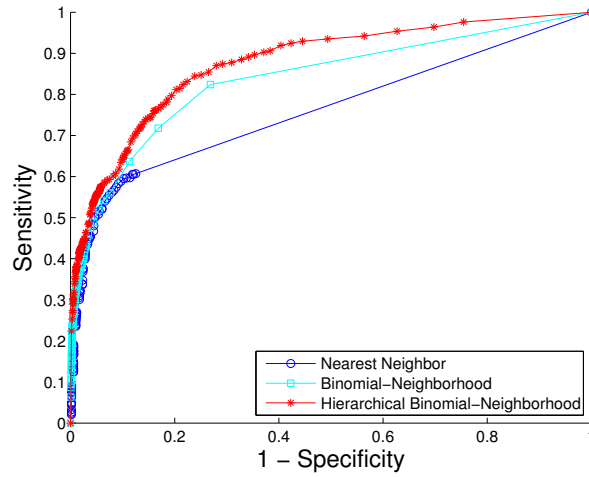

Figure 1: ROC curves by 5-fold cross-validation study.

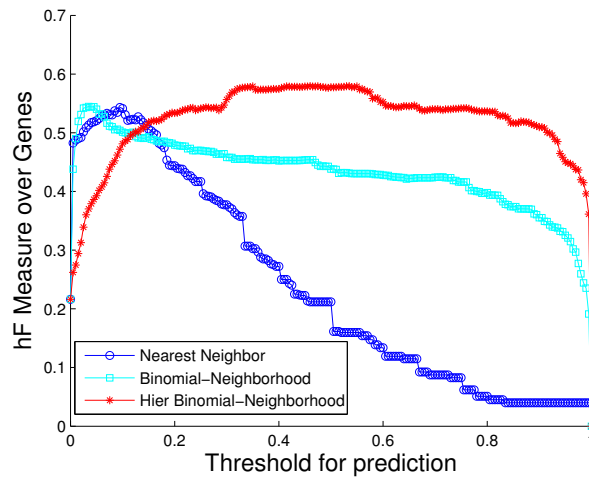

Figure 2:  $hF$  measure v.s. threshold.

13. Hierarchy root: GO:0007582, physiological process  
 Number of terms in hierarchy = 15  
 Number of terms predicted = 8  
 Number of genes predicted = 4052

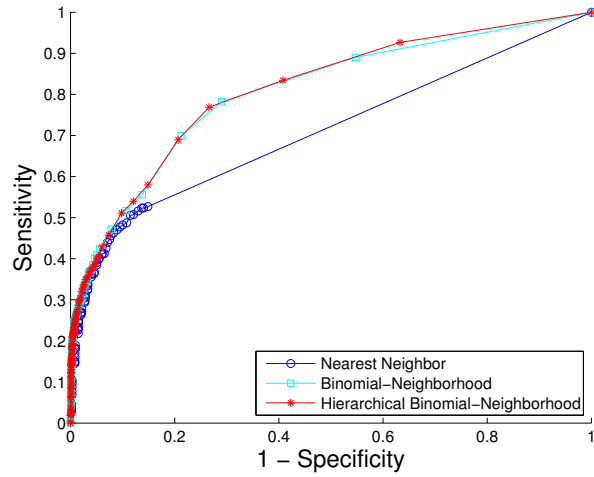

Figure 1: ROC curves by 5-fold cross-validation study.

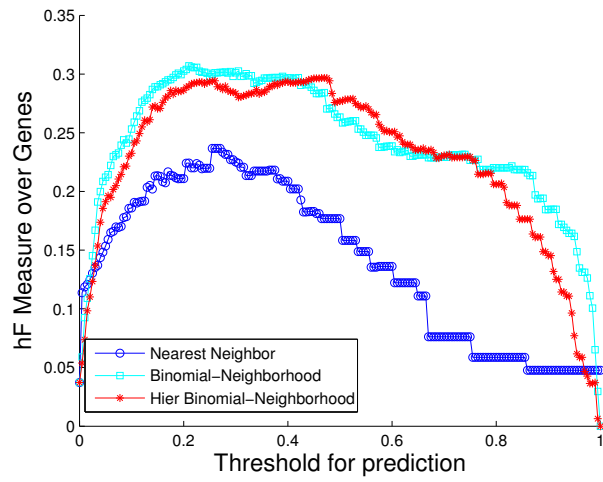

Figure 2:  $hF$  measure v.s. threshold.

14. Hierarchy root: GO:0008150, biological process  
 Number of terms in hierarchy = 70  
 Number of terms predicted = 41  
 Number of genes predicted = 5143

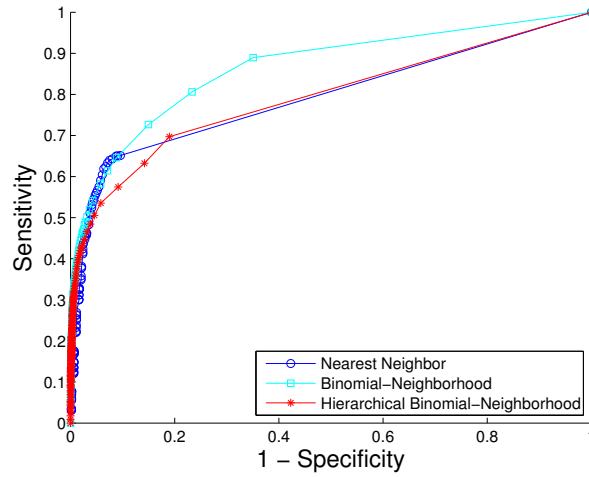

Figure 1: ROC curves by 5-fold cross-validation study.

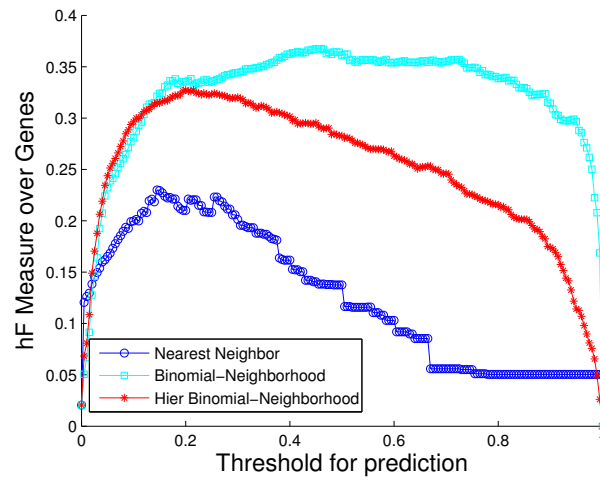

Figure 2:  $hF$  measure v.s. threshold.

15. Hierarchy root: GO:0008152, metabolism  
 Number of terms in hierarchy = 8  
 Number of terms predicted = 5  
 Number of genes predicted = 2842

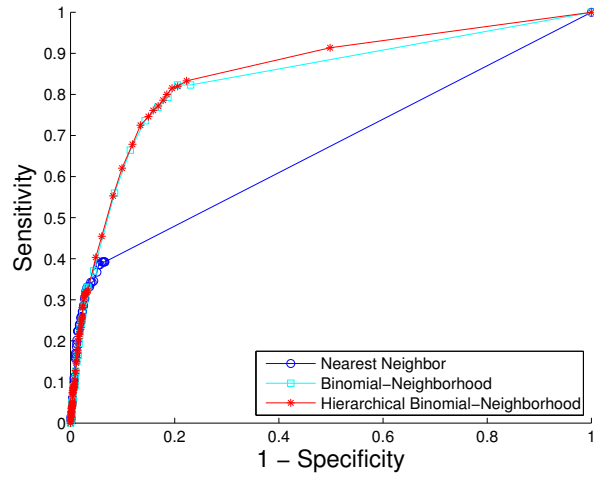

Figure 1: ROC curves by 5-fold cross-validation study.

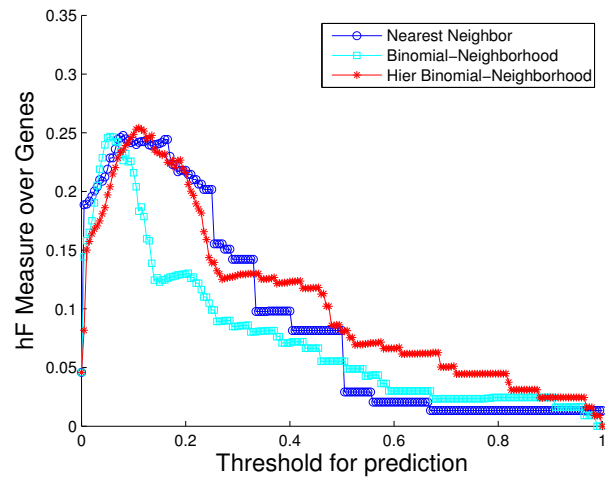

Figure 2:  $hF$  measure v.s. threshold.

16. Hierarchy root: GO:0009056, catabolism  
 Number of terms in hierarchy = 11  
 Number of terms predicted = 8  
 Number of genes predicted = 350

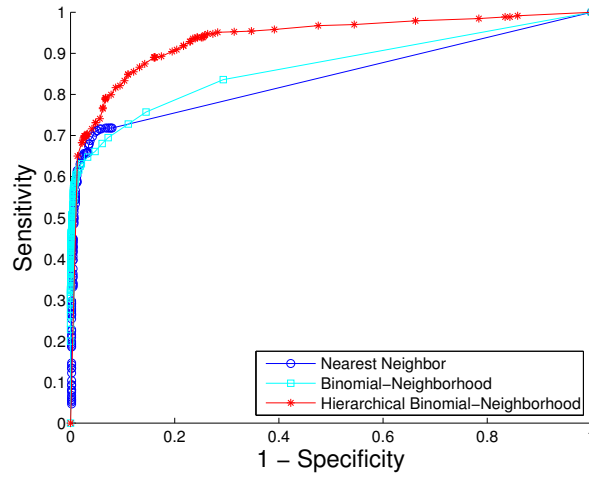

Figure 1: ROC curves by 5-fold cross-validation study.

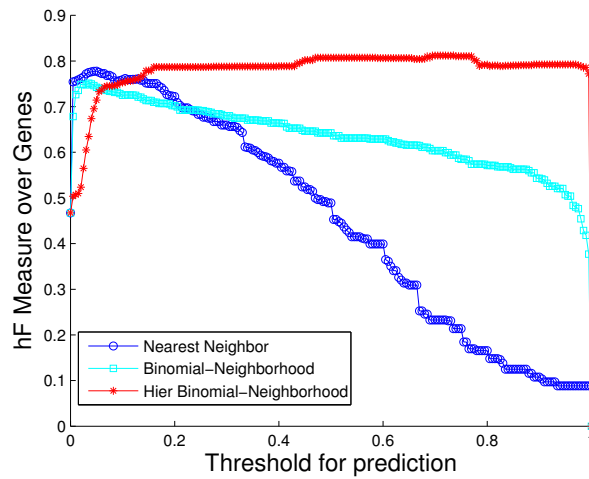

Figure 2:  $hF$  measure v.s. threshold.



17. Hierarchy root: GO:0009058, biosynthesis  
 Number of terms in hierarchy = 28  
 Number of terms predicted = 14  
 Number of genes predicted = 841

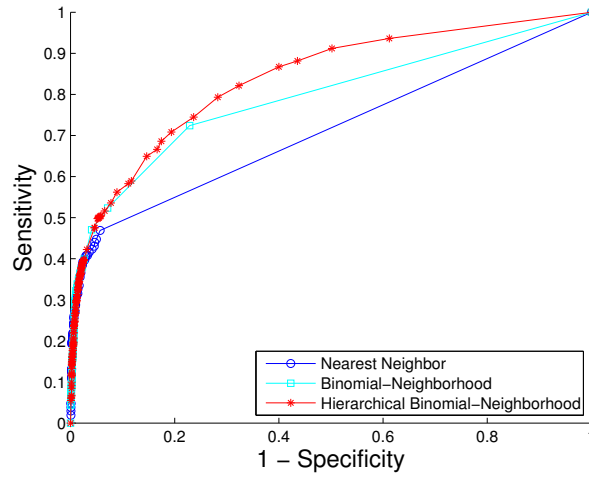

Figure 1: ROC curves by 5-fold cross-validation study.

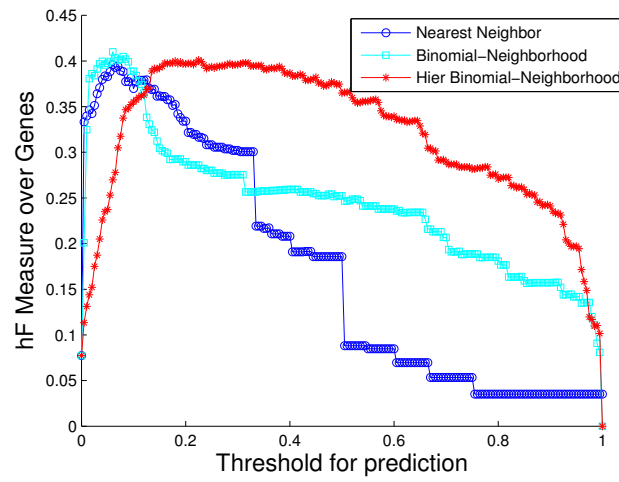

Figure 2:  $hF$  measure v.s. threshold.

18. Hierarchy root: GO:0009059, macromolecule biosynthesis  
 Number of terms in hierarchy = 28  
 Number of terms predicted = 20  
 Number of genes predicted = 523

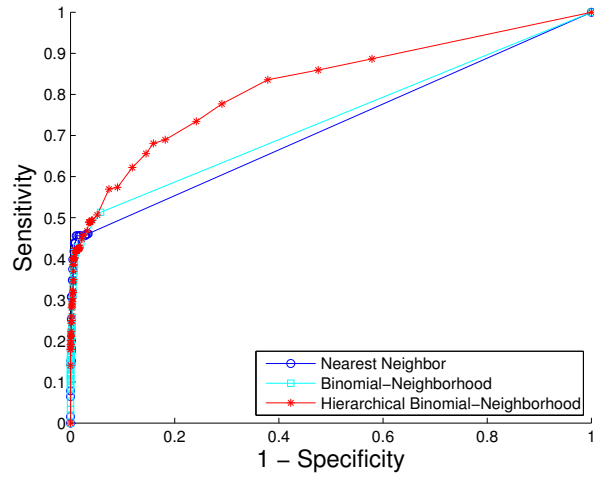

Figure 1: ROC curves by 5-fold cross-validation study.

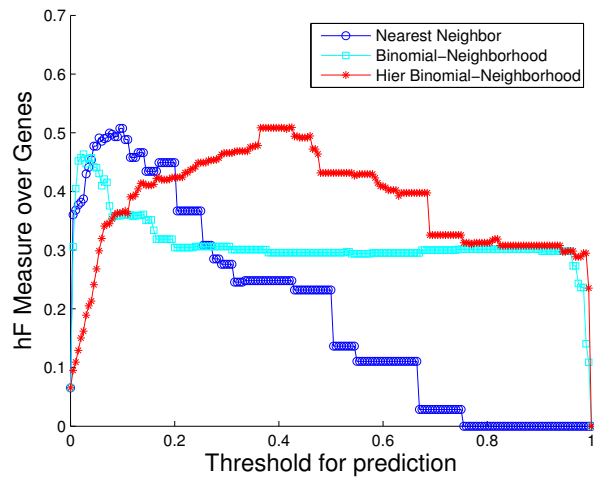

Figure 2:  $hF$  measure v.s. threshold.

19. Hierarchy root: GO:0009987, cellular process  
 Number of terms in hierarchy = 47  
 Number of terms predicted = 34  
 Number of genes predicted = 4029

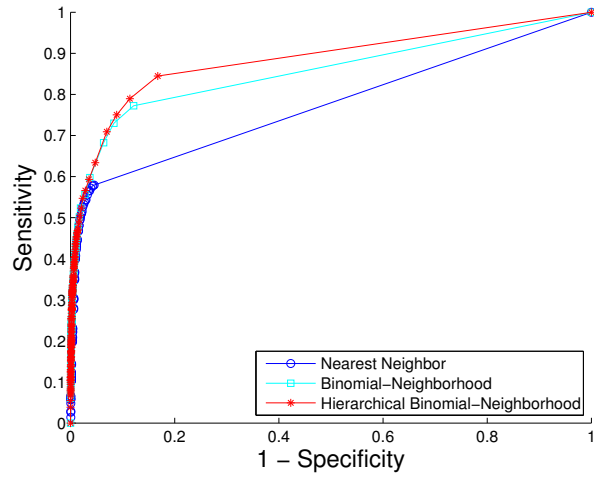

Figure 1: ROC curves by 5-fold cross-validation study.

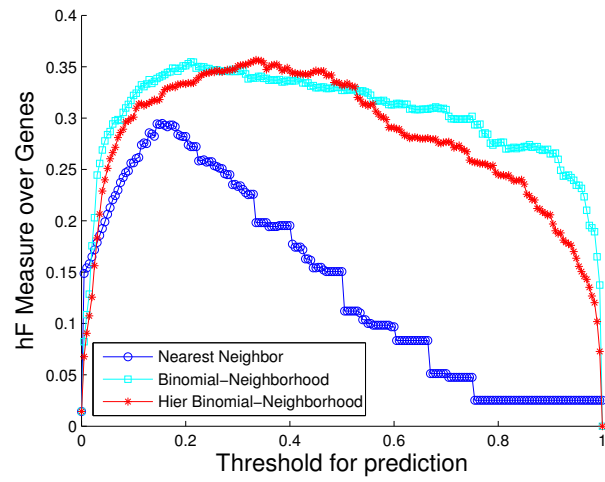

Figure 2:  $hF$  measure v.s. threshold.

20. Hierarchy root: GO:0016043, cell organization and biogenesis  
 Number of terms in hierarchy = 53  
 Number of terms predicted = 41  
 Number of genes predicted = 1554

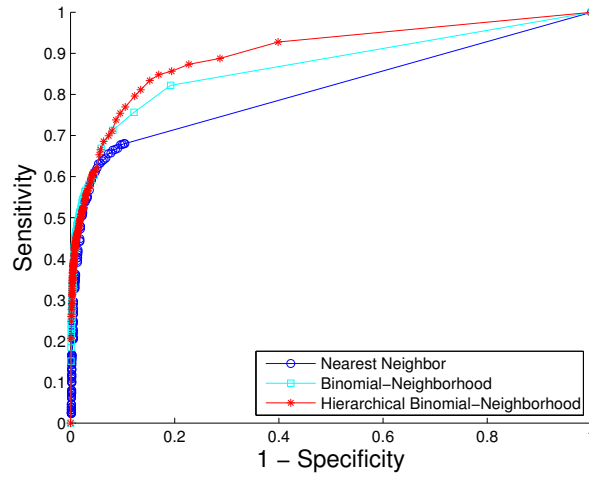

Figure 1: ROC curves by 5-fold cross-validation study.

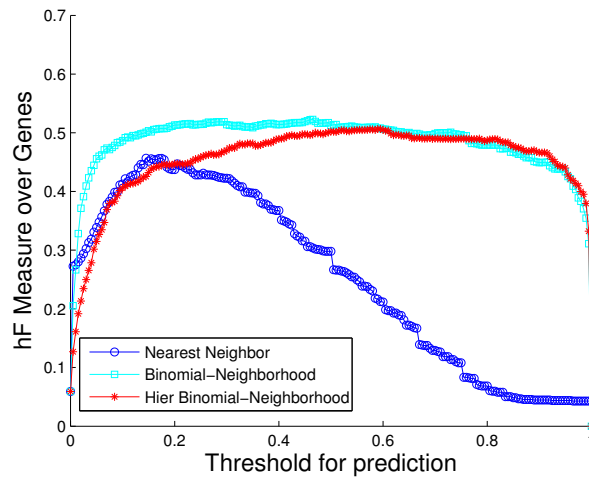

Figure 2:  $hF$  measure v.s. threshold.

21. Hierarchy root: GO:0016070, RNA metabolism  
 Number of terms in hierarchy = 57  
 Number of terms predicted = 23  
 Number of genes predicted = 441

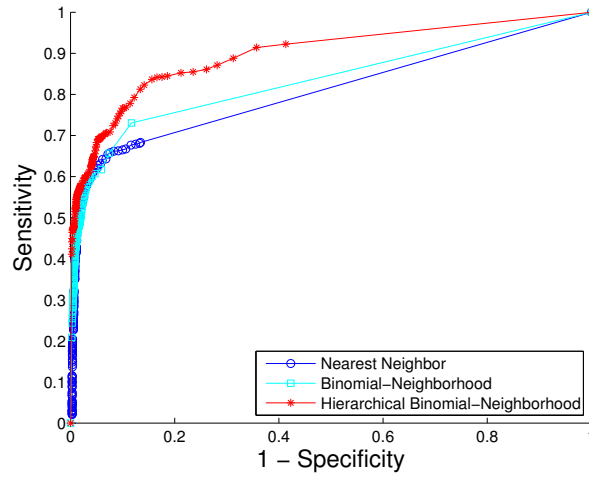

Figure 1: ROC curves by 5-fold cross-validation study.

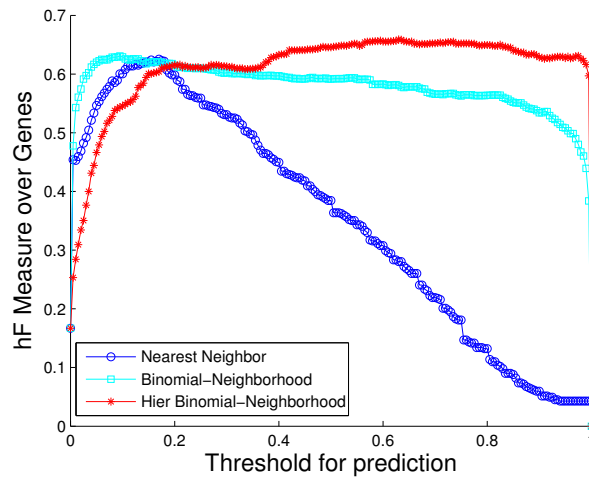

Figure 2:  $hF$  measure v.s. threshold.

22. Hierarchy root: GO:0019219, regulation of nucleobase, nucleoside, nucleotide and nucleic acid metabolism  
 Number of terms in hierarchy = 32  
 Number of terms predicted = 16  
 Number of genes predicted = 340

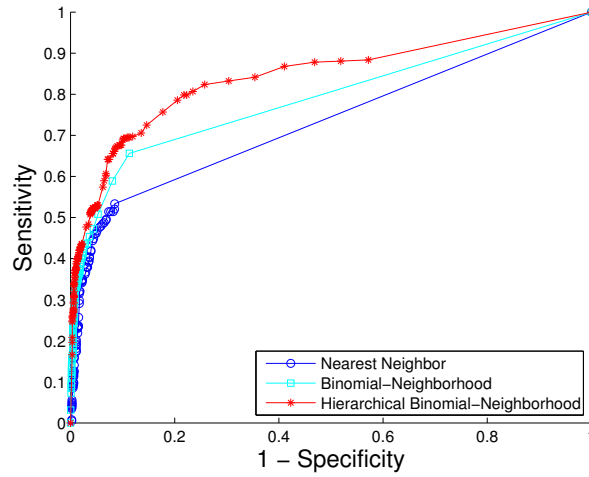

Figure 1: ROC curves by 5-fold cross-validation study.

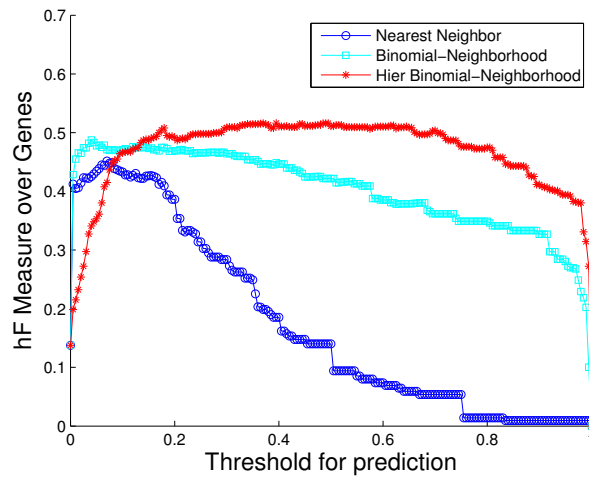

Figure 2:  $hF$  measure v.s. threshold.

23. Hierarchy root: GO:0019222, regulation of metabolism  
 Number of terms in hierarchy = 33  
 Number of terms predicted = 14  
 Number of genes predicted = 424

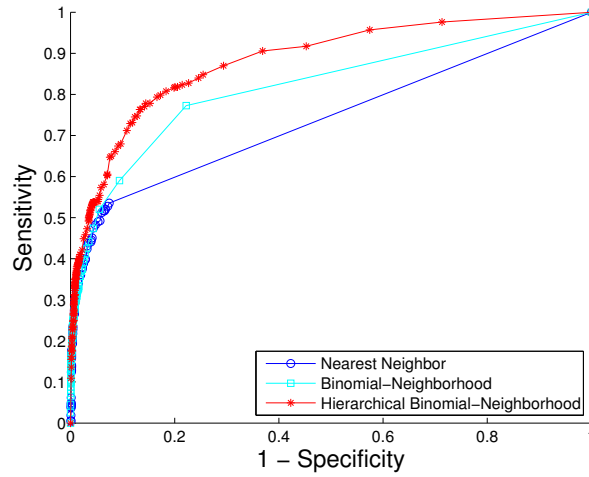

Figure 1: ROC curves by 5-fold cross-validation study.

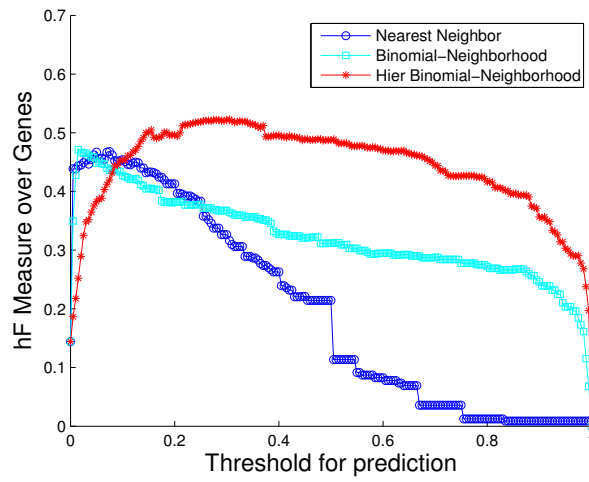

Figure 2:  $hF$  measure v.s. threshold.

24. Hierarchy root: GO:0019538, protein metabolism  
 Number of terms in hierarchy = 36  
 Number of terms predicted = 15  
 Number of genes predicted = 1105

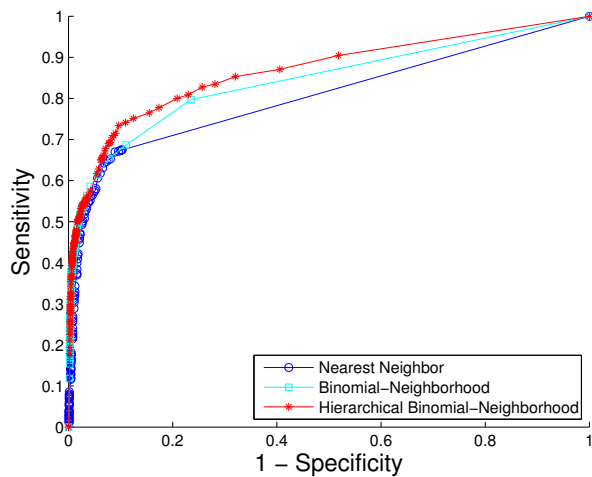

Figure 1: ROC curves by 5-fold cross-validation study.

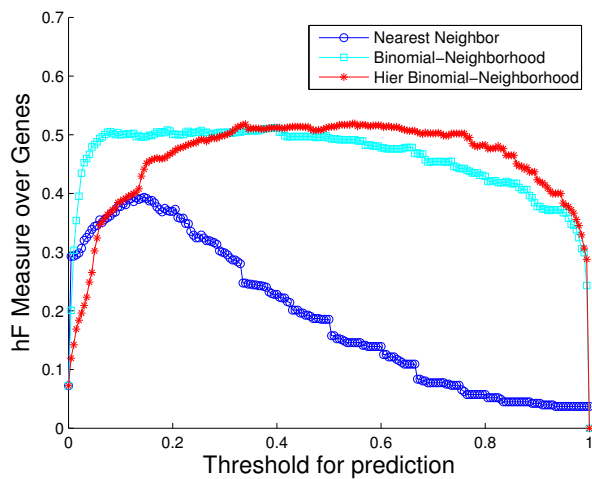

Figure 2:  $hF$  measure v.s. threshold.



25. Hierarchy root: GO:0031323, regulation of cellular metabolism  
 Number of terms in hierarchy = 33  
 Number of terms predicted = 17  
 Number of genes predicted = 399

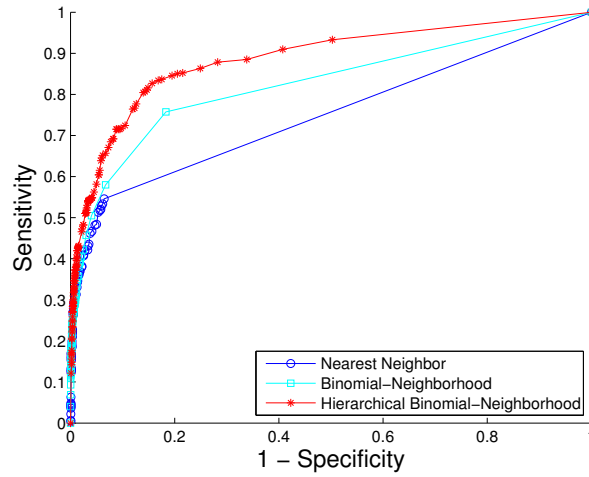

Figure 1: ROC curves by 5-fold cross-validation study.

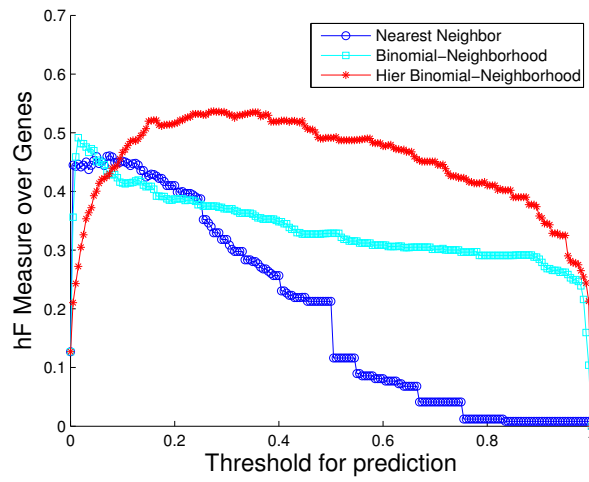

Figure 2:  $hF$  measure v.s. threshold.

26. Hierarchy root: GO:0043170, macromolecule metabolism  
 Number of terms in hierarchy = 73  
 Number of terms predicted = 36  
 Number of genes predicted = 2001

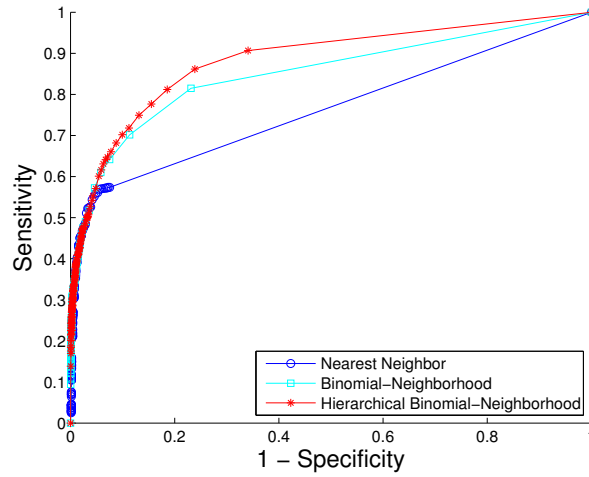

Figure 1: ROC curves by 5-fold cross-validation study.

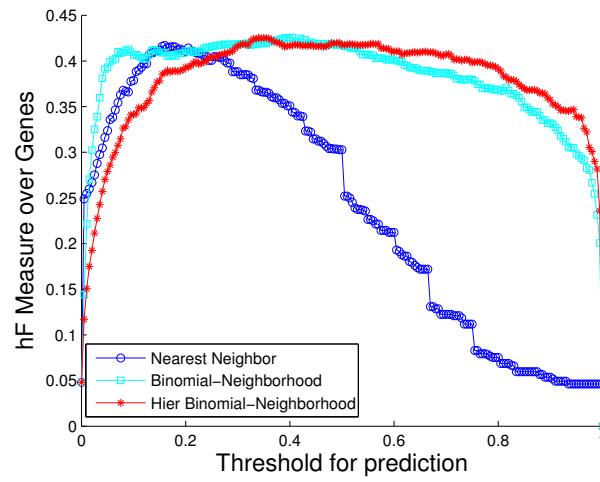

Figure 2:  $hF$  measure v.s. threshold.

27. Hierarchy root: GO:0043283, biopolymer metabolism  
 Number of terms in hierarchy = 53  
 Number of terms predicted = 36  
 Number of genes predicted = 1438

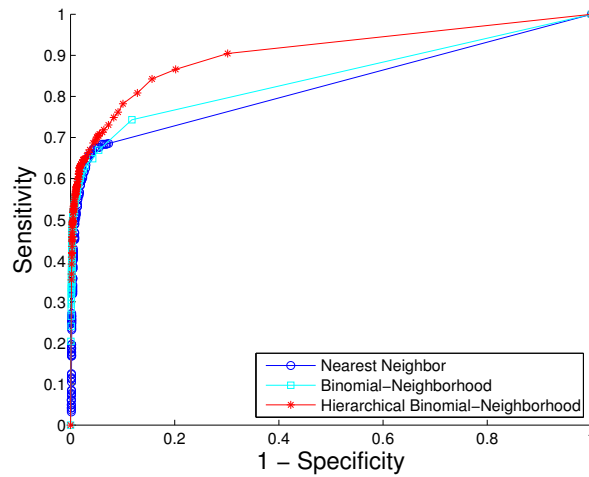

Figure 1: ROC curves by 5-fold cross-validation study.

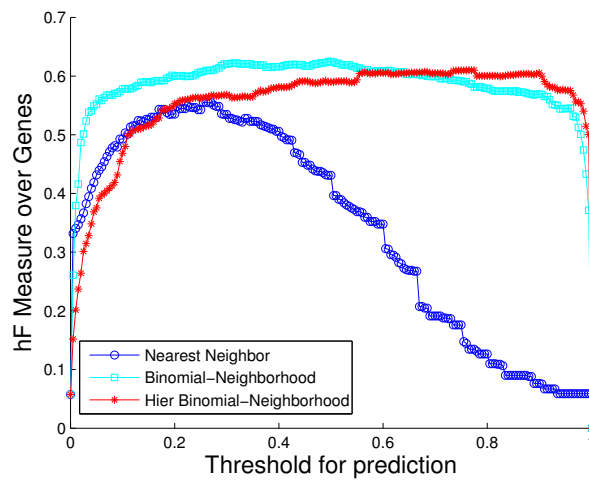

Figure 2:  $hF$  measure v.s. threshold.

28. Hierarchy root: GO:0043412, biopolymer modification  
 Number of terms in hierarchy = 22  
 Number of terms predicted = 12  
 Number of genes predicted = 491

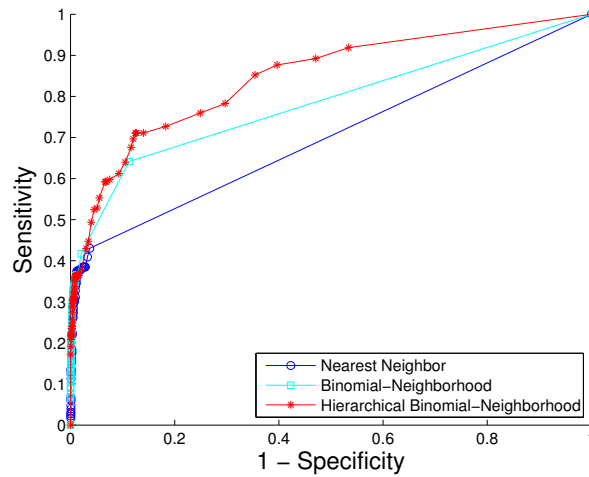

Figure 1: ROC curves by 5-fold cross-validation study.

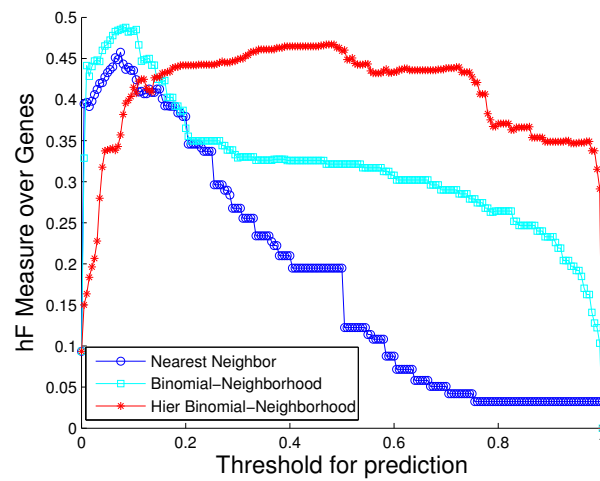

Figure 2:  $hF$  measure v.s. threshold.

29. Hierarchy root: GO:0044237, cellular metabolism  
 Number of terms in hierarchy = 266  
 Number of terms predicted = 149  
 Number of genes predicted = 2760

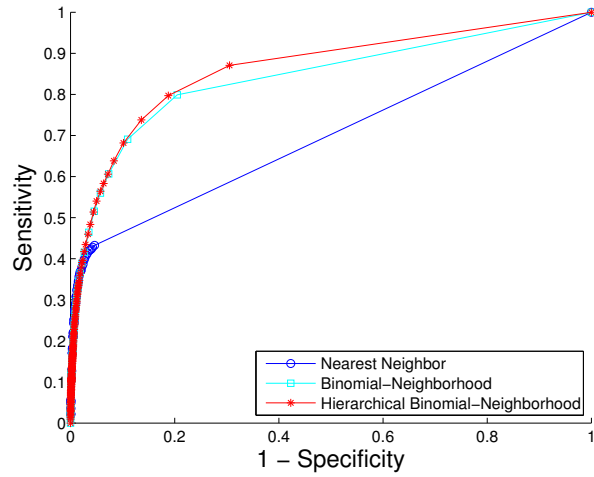

Figure 1: ROC curves by 5-fold cross-validation study.

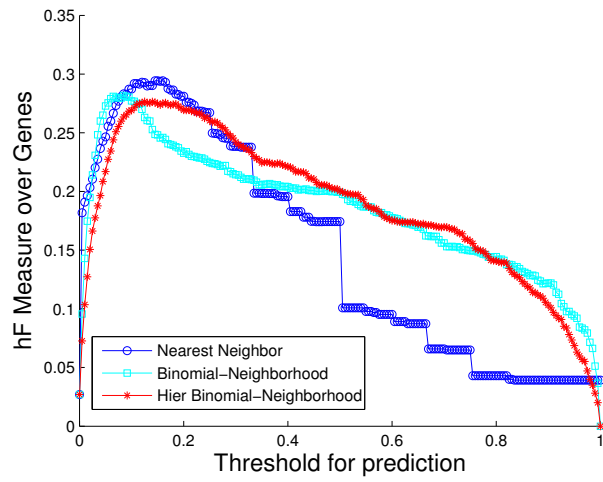

Figure 2:  $hF$  measure v.s. threshold.

30. Hierarchy root: GO:0044238, primary metabolism  
 Number of terms in hierarchy = 319  
 Number of terms predicted = 150  
 Number of genes predicted = 2600

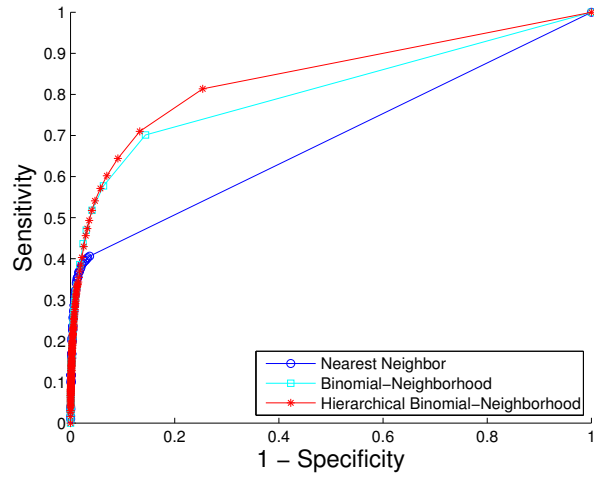

Figure 1: ROC curves by 5-fold cross-validation study.

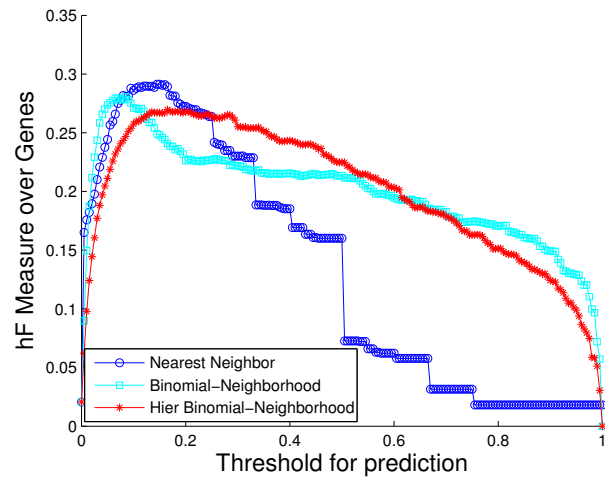

Figure 2:  $hF$  measure v.s. threshold.

31. Hierarchy root: GO:0044248, cellular catabolism  
 Number of terms in hierarchy = 154  
 Number of terms predicted = 51  
 Number of genes predicted = 338

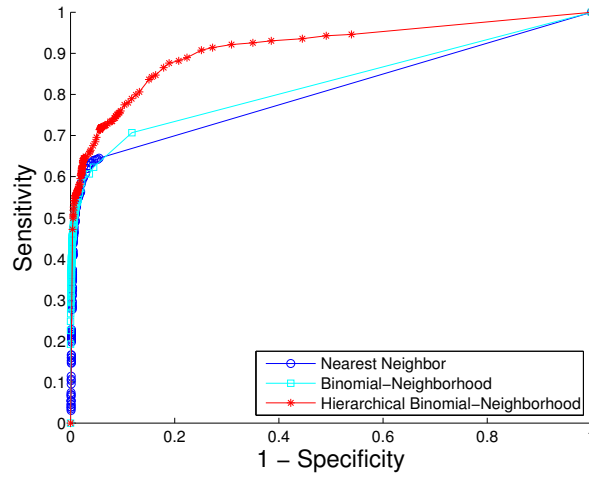

Figure 1: ROC curves by 5-fold cross-validation study.

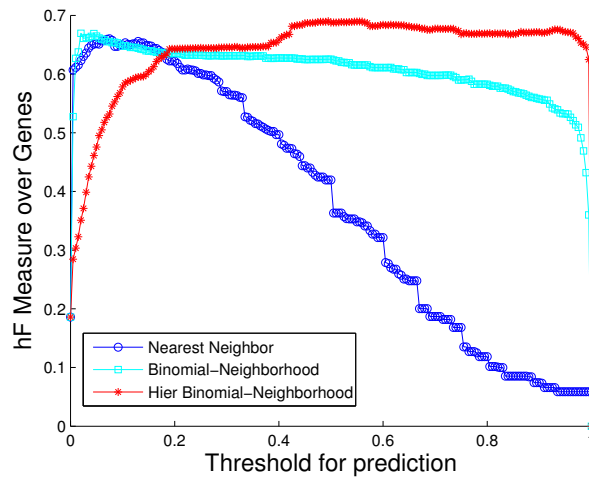

Figure 2:  $hF$  measure v.s. threshold.

32. Hierarchy root: GO:0044249, cellular biosynthesis  
 Number of terms in hierarchy = 148  
 Number of terms predicted = 67  
 Number of genes predicted = 768

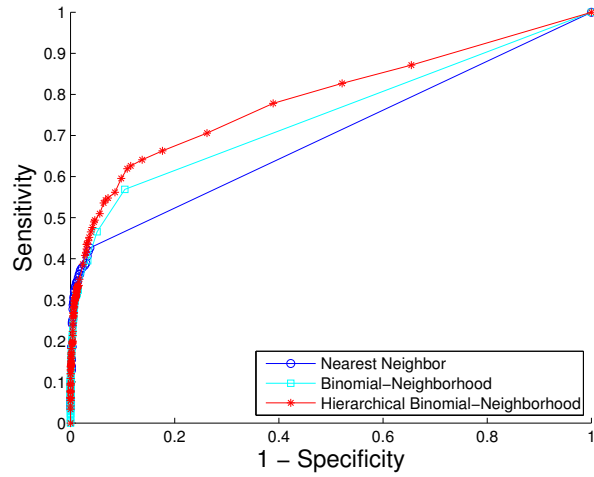

Figure 1: ROC curves by 5-fold cross-validation study.

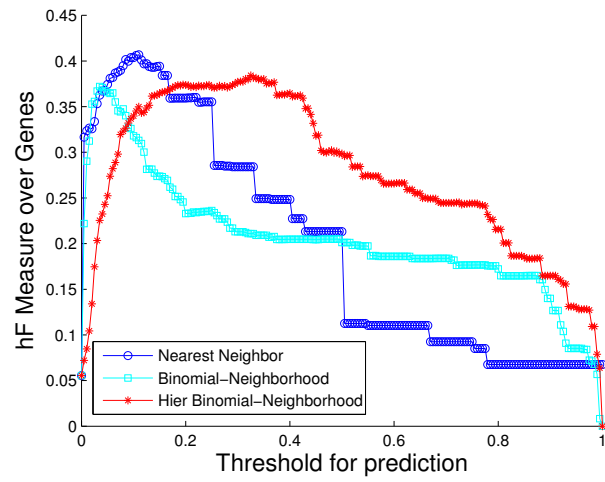

Figure 2:  $hF$  measure v.s. threshold.



33. Hierarchy root: GO:0044260, cellular macromolecule metabolism  
 Number of terms in hierarchy = 32  
 Number of terms predicted = 20  
 Number of genes predicted = 1031

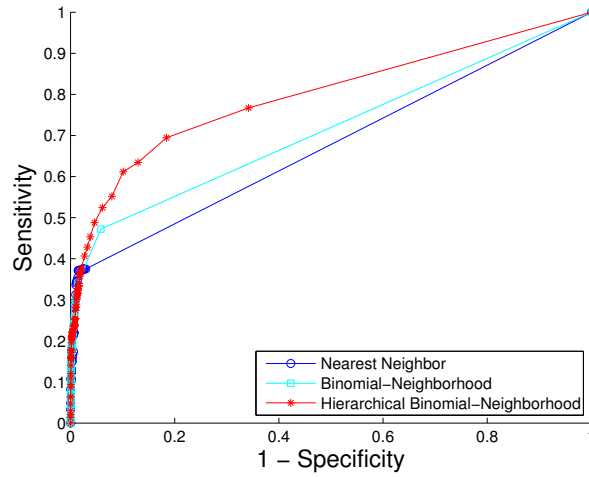

Figure 1: ROC curves by 5-fold cross-validation study.

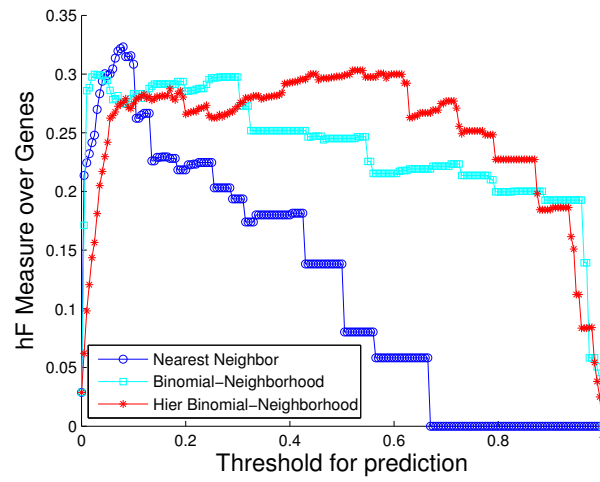

Figure 2:  $hF$  measure v.s. threshold.

34. Hierarchy root: GO:0044267, cellular protein metabolism  
 Number of terms in hierarchy = 49  
 Number of terms predicted = 22  
 Number of genes predicted = 986

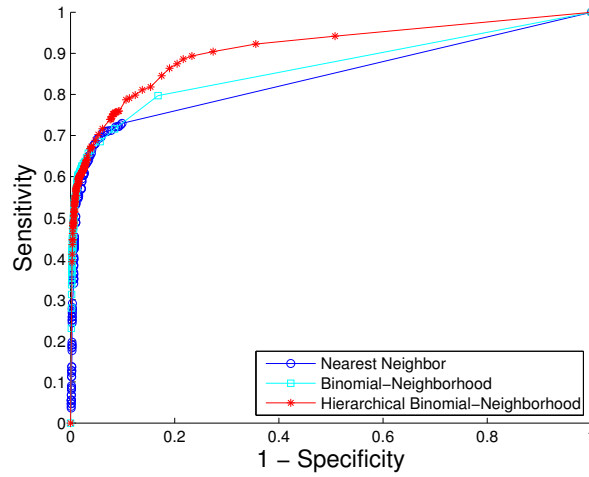

Figure 1: ROC curves by 5-fold cross-validation study.

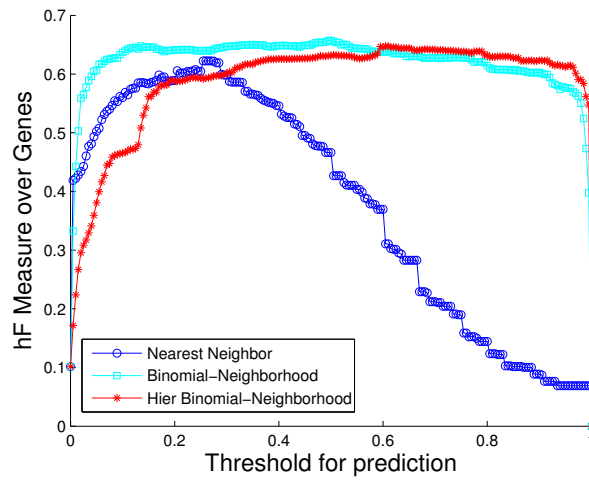

Figure 2:  $hF$  measure v.s. threshold.

35. Hierarchy root: GO:0045449, regulation of transcription  
 Number of terms in hierarchy = 43  
 Number of terms predicted = 27  
 Number of genes predicted = 309

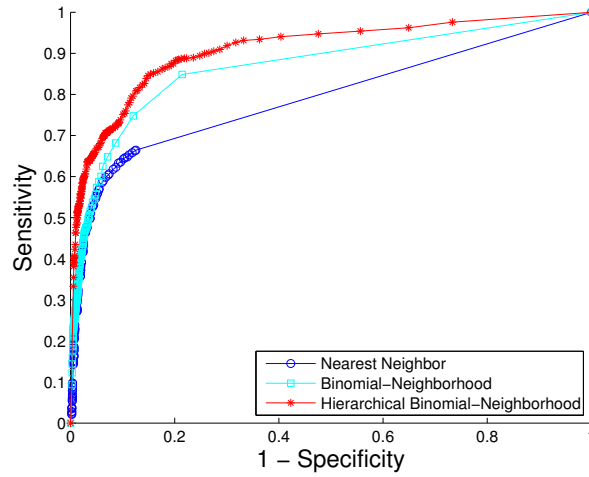

Figure 1: ROC curves by 5-fold cross-validation study.

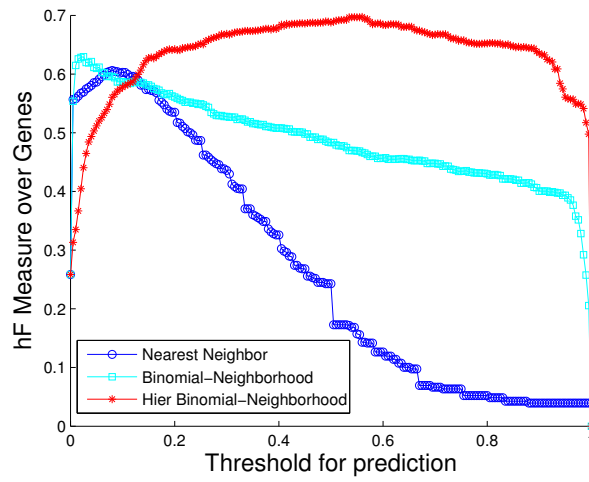

Figure 2:  $hF$  measure v.s. threshold.

36. Hierarchy root: GO:0046907, intracellular transport  
 Number of terms in hierarchy = 92  
 Number of terms predicted = 54  
 Number of genes predicted = 491

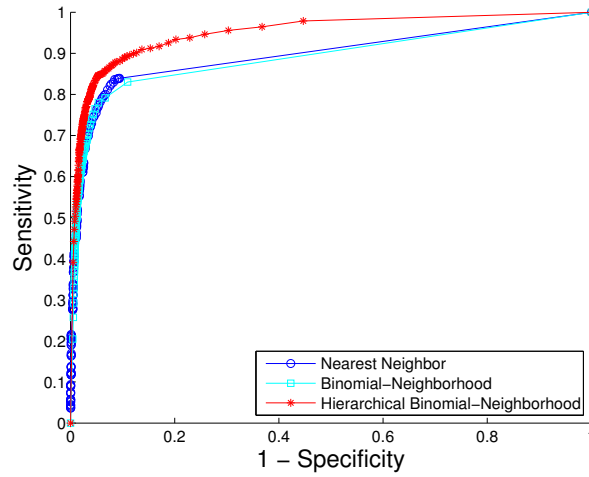

Figure 1: ROC curves by 5-fold cross-validation study.

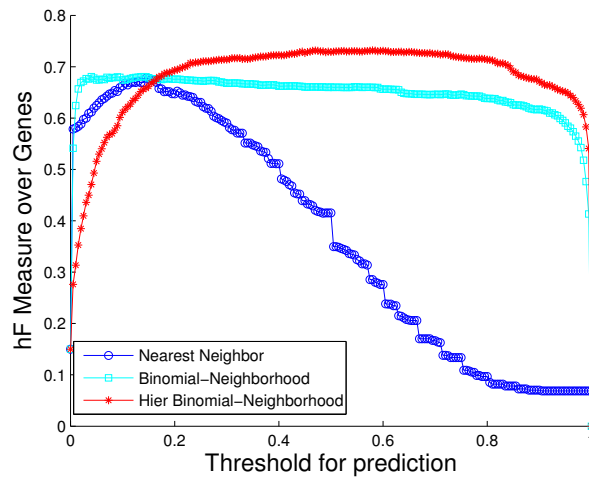

Figure 2:  $hF$  measure v.s. threshold.

37. Hierarchy root: GO:0050789, regulation of biological process  
 Number of terms in hierarchy = 42  
 Number of terms predicted = 19  
 Number of genes predicted = 618

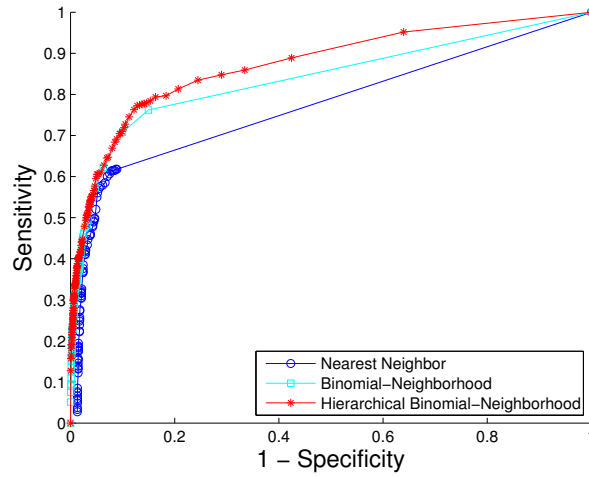

Figure 1: ROC curves by 5-fold cross-validation study.

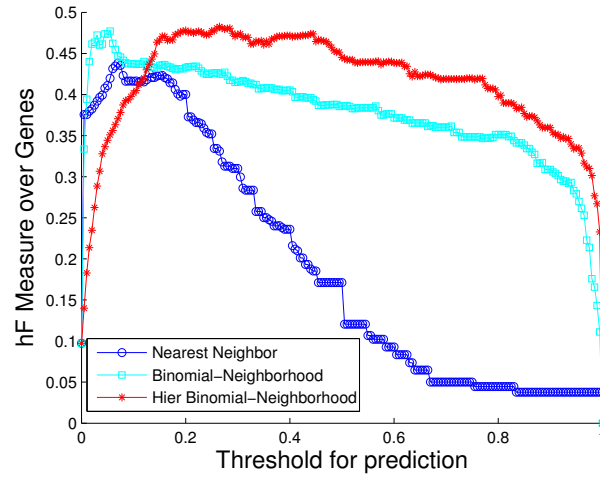

Figure 2:  $hF$  measure v.s. threshold.

38. Hierarchy root: GO:0050791, regulation of physiological process  
 Number of terms in hierarchy = 3  
 Number of terms predicted = 3  
 Number of genes predicted = 608

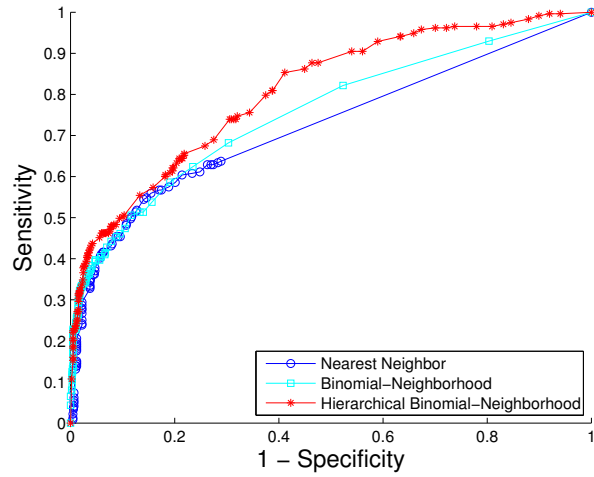

Figure 1: ROC curves by 5-fold cross-validation study.

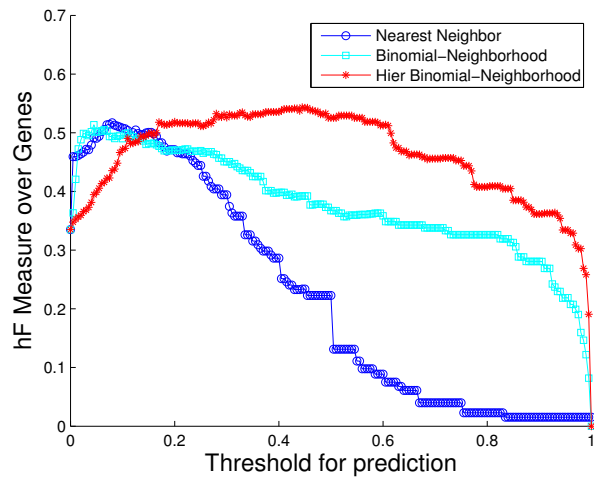

Figure 2:  $hF$  measure v.s. threshold.

39. Hierarchy root: GO:0050794, regulation of cellular process  
 Number of terms in hierarchy = 7  
 Number of terms predicted = 3  
 Number of genes predicted = 592

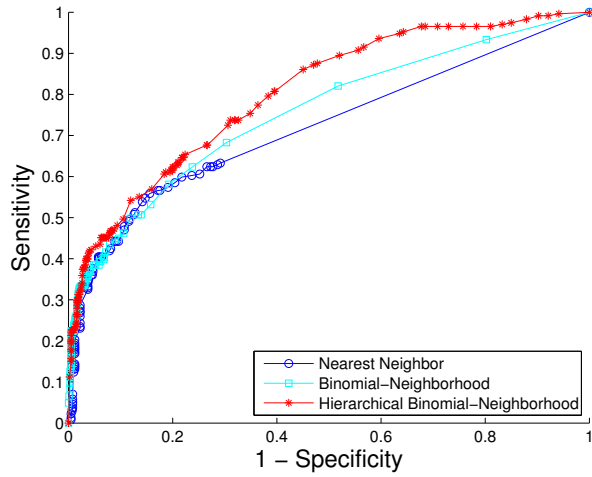

Figure 1: ROC curves by 5-fold cross-validation study.

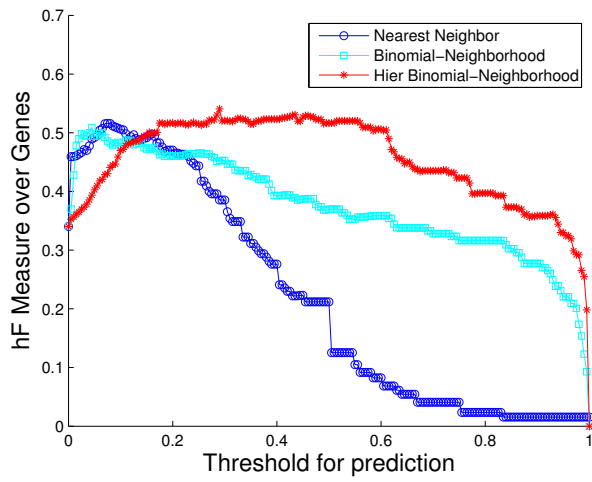

Figure 2:  $hF$  measure v.s. threshold.

40. Hierarchy root: GO:0050875, cellular physiological process  
 Number of terms in hierarchy = 83  
 Number of terms predicted = 59  
 Number of genes predicted = 4000

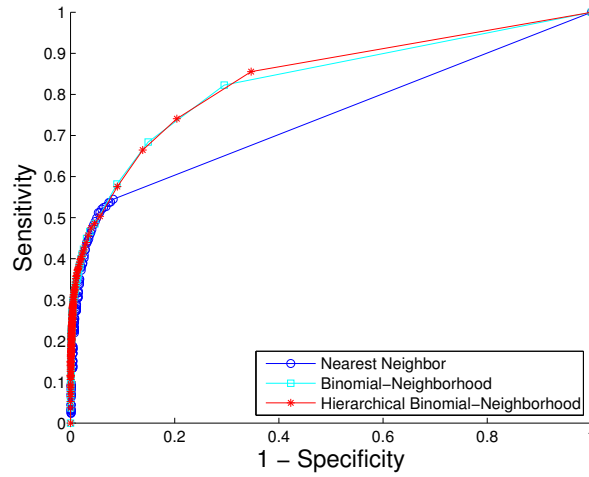

Figure 1: ROC curves by 5-fold cross-validation study.

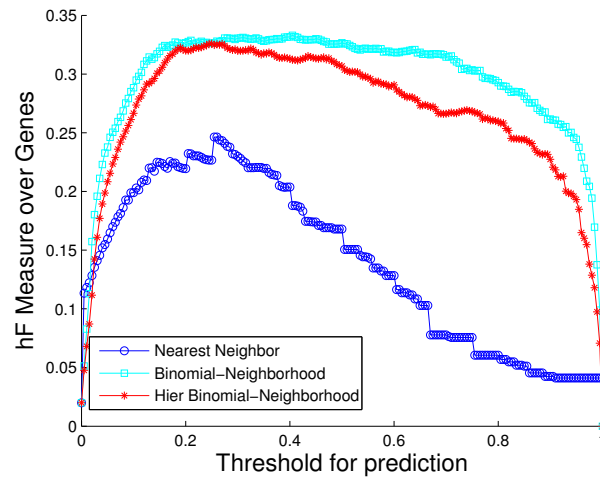

Figure 2:  $hF$  measure v.s. threshold.



41. Hierarchy root: GO:0050896, response to stimulus  
 Number of terms in hierarchy = 72  
 Number of terms predicted = 40  
 Number of genes predicted = 536

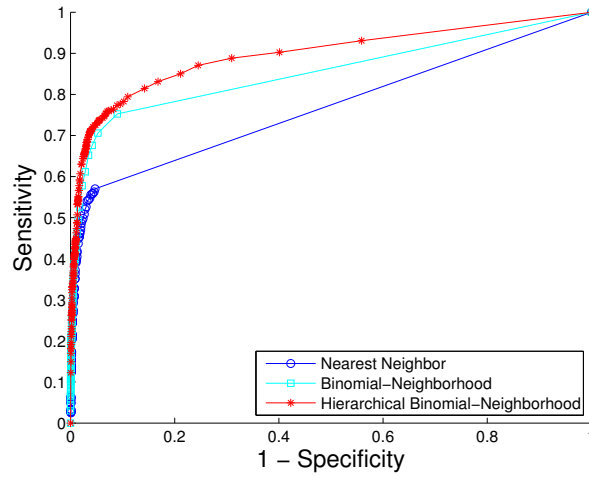

Figure 1: ROC curves by 5-fold cross-validation study.

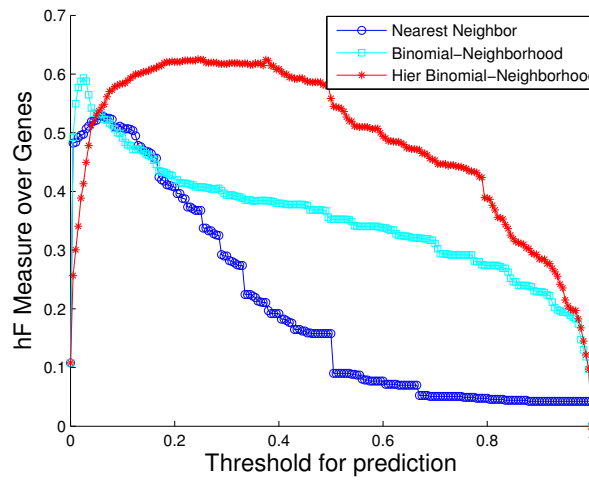

Figure 2:  $hF$  measure v.s. threshold.

42. Hierarchy root: GO:0051179, localization  
 Number of terms in hierarchy = 14  
 Number of terms predicted = 9  
 Number of genes predicted = 964

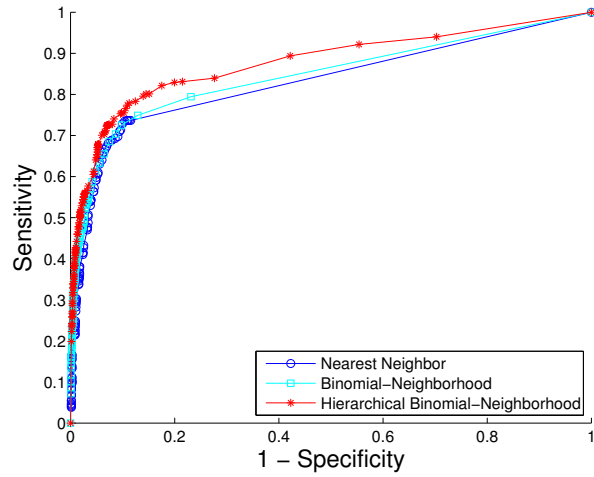

Figure 1: ROC curves by 5-fold cross-validation study.

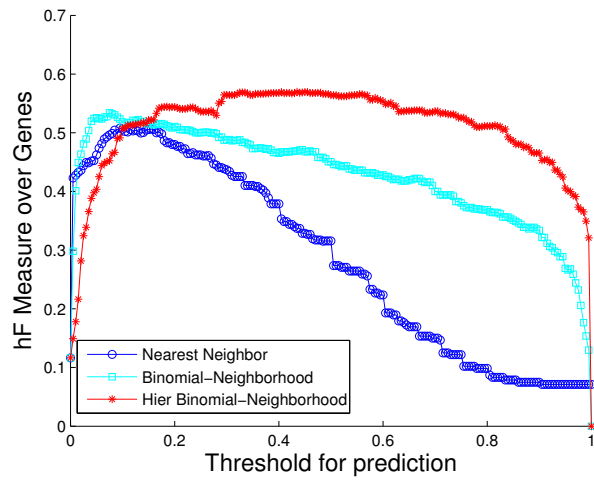

Figure 2:  $hF$  measure v.s. threshold.

43. Hierarchy root: GO:0051234, establishment of localization  
 Number of terms in hierarchy = 8  
 Number of terms predicted = 6  
 Number of genes predicted = 923

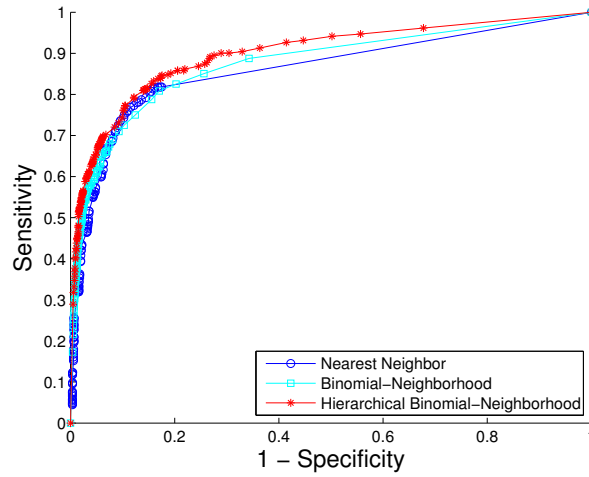

Figure 1: ROC curves by 5-fold cross-validation study.

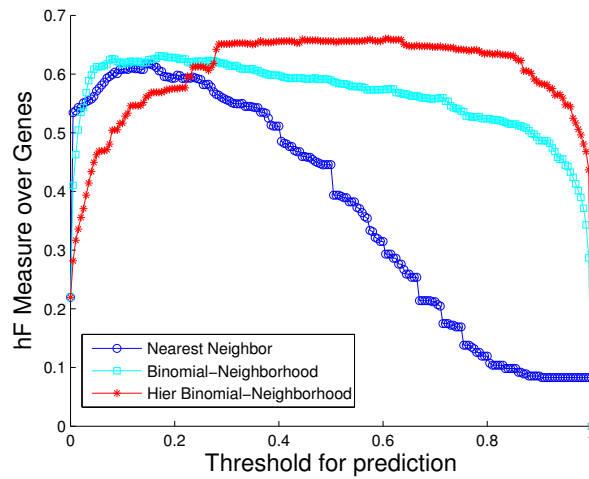

Figure 2:  $hF$  measure v.s. threshold.

44. Hierarchy root: GO:0051244, regulation of cellular physiological process  
 Number of terms in hierarchy = 95  
 Number of terms predicted = 34  
 Number of genes predicted = 591

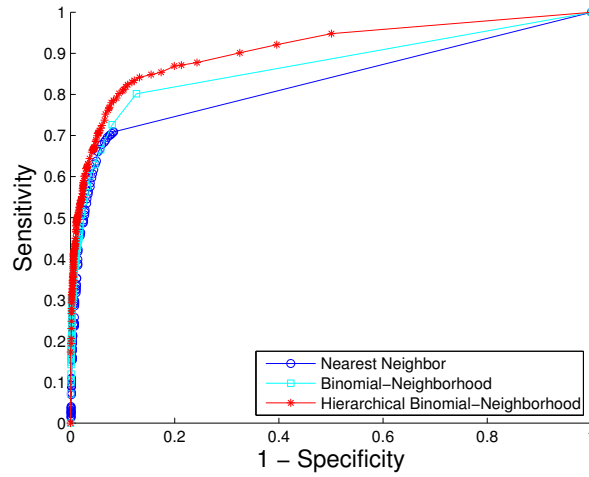

Figure 1: ROC curves by 5-fold cross-validation study.

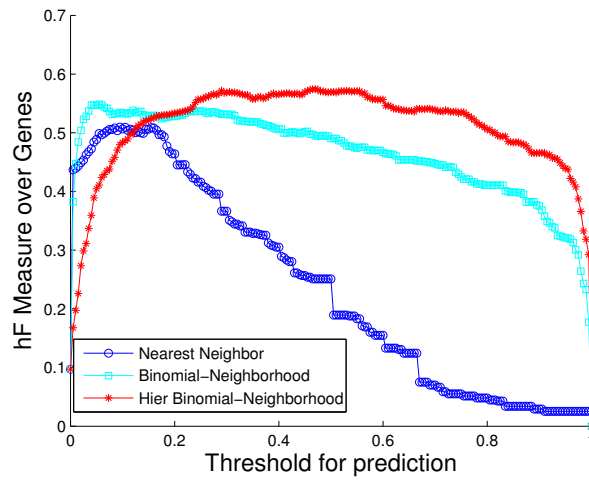

Figure 2:  $hF$  measure v.s. threshold.

45. Hierarchy root: GO:0051276, chromosome organization and biogenesis  
 Number of terms in hierarchy = 6  
 Number of terms predicted = 3  
 Number of genes predicted = 367

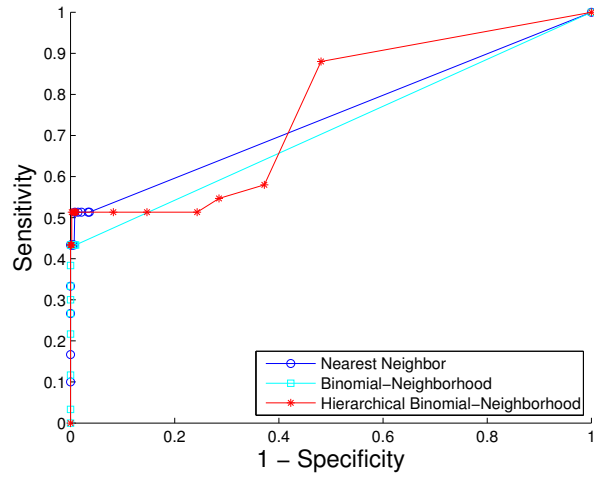

Figure 1: ROC curves by 5-fold cross-validation study.

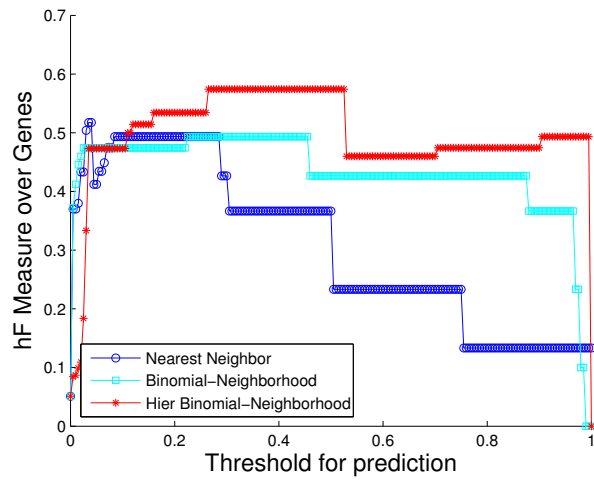

Figure 2:  $hF$  measure v.s. threshold.

46. Hierarchy root: GO:0051641, cellular localization  
 Number of terms in hierarchy = 12  
 Number of terms predicted = 6  
 Number of genes predicted = 527

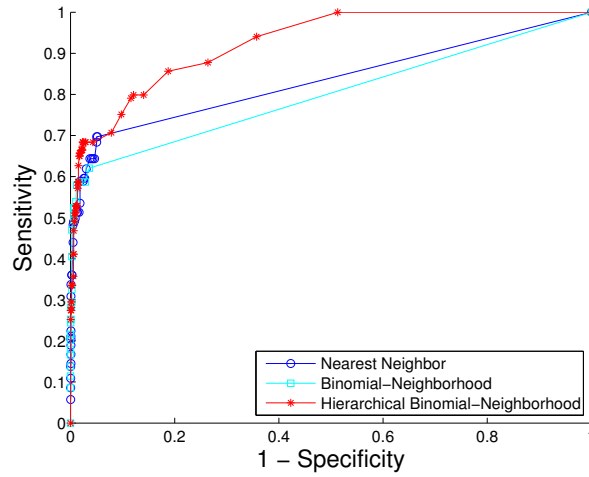

Figure 1: ROC curves by 5-fold cross-validation study.

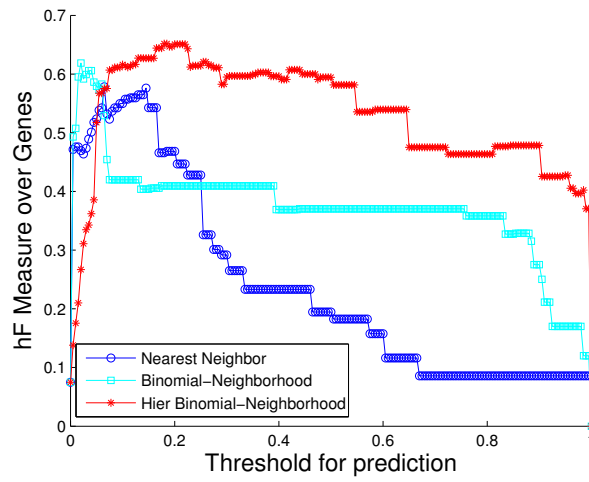

Figure 2:  $hF$  measure v.s. threshold.

47. Hierarchy root: GO:0051649, establishment of cellular localization  
 Number of terms in hierarchy = 7  
 Number of terms predicted = 7  
 Number of genes predicted = 500

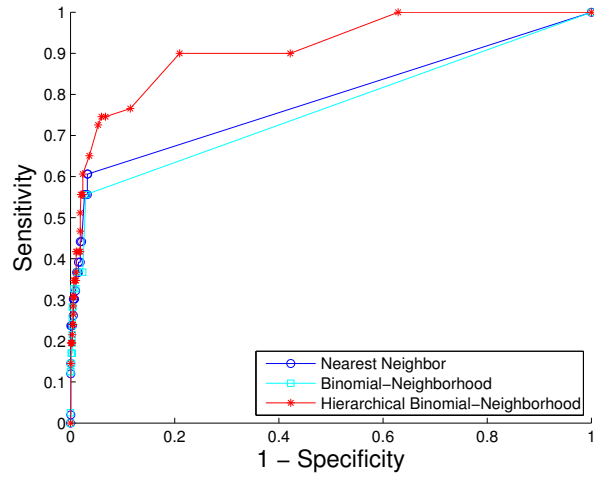

Figure 1: ROC curves by 5-fold cross-validation study.

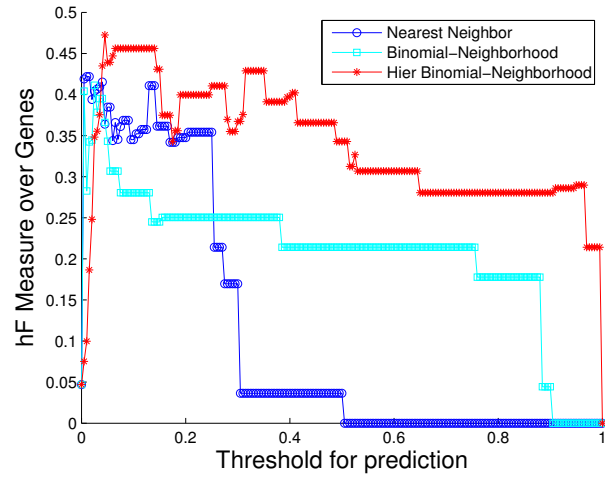

Figure 2:  $hF$  measure v.s. threshold.
